# Supplementary material for: The MarR-Type Repressor MhqR Confers Quinone and Antimicrobial Resistance in Staphylococcus aureus
Source: PubMed Central journal article supplement (PMC6798810; doi:10.1089/ars.2019.7750), 2019-10-17
Supplement: Supp_Fig1.pdf [file Supp_Fig1.pdf]

**Figure S1**

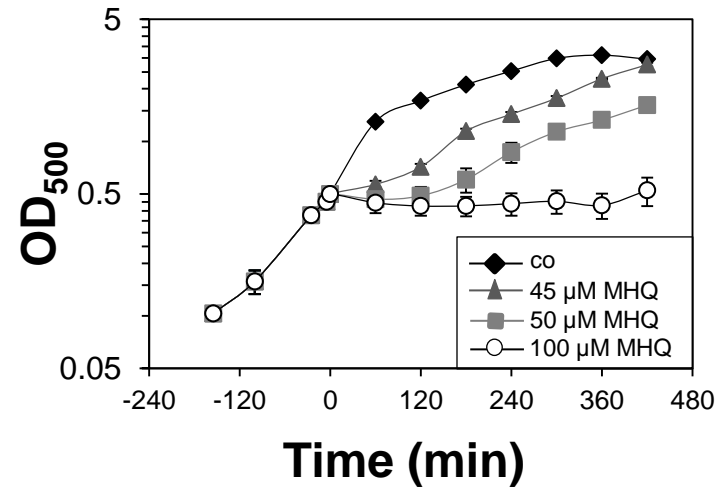

**Fig. S1. Determination of the sub-lethal concentration of MHQ in *S. aureus* COL.** For growth curves, *S. aureus* COL wild type was grown in RPMI medium until an OD<sub>500</sub> of 0.5 and exposed to 45 μM, 50 μM and 100 μM MHQ. The results are from three biological replicates. Error bars represent the standard deviation.
