# Supplementary material for: The MarR-Type Repressor MhqR Confers Quinone and Antimicrobial Resistance in Staphylococcus aureus
Source: PubMed Central journal article supplement (PMC6798810; doi:10.1089/ars.2019.7750), 2019-10-17
Supplement: Supp_Fig3.pdf [file Supp_Fig3.pdf]

## Figure S3A

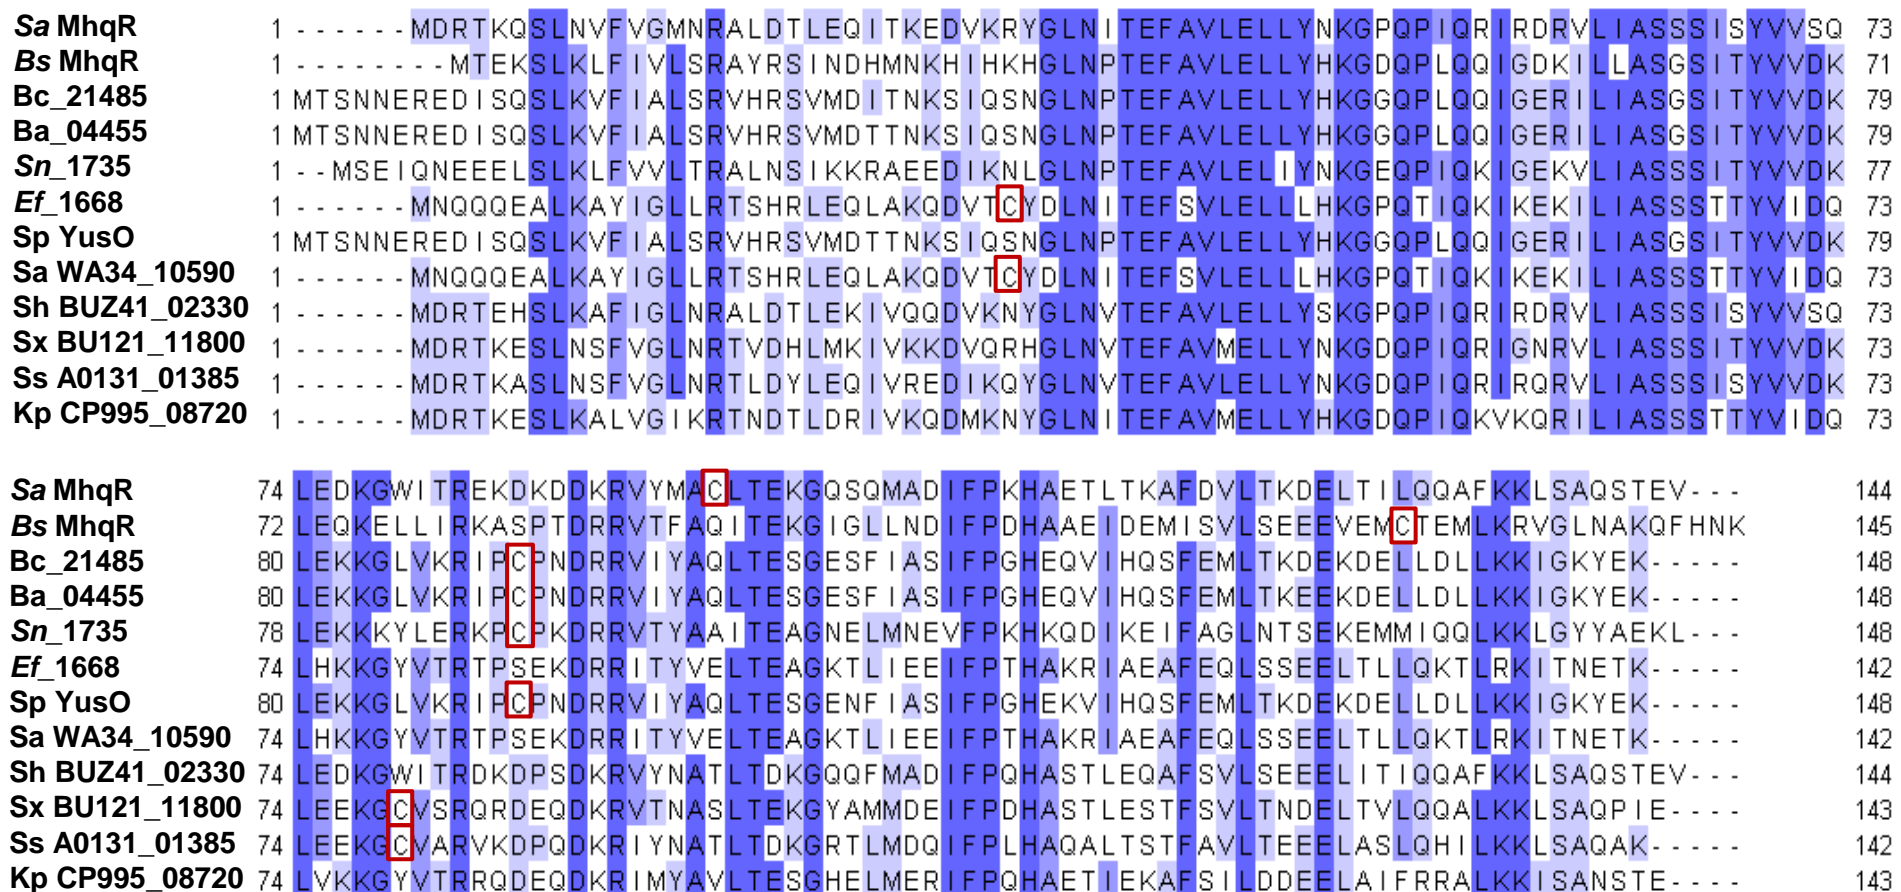

**Fig. S3A. Protein sequence alignments of MhqR homologs in bacteria.** Alignment was performed with ClustalQ2 and presented in Jalview. Intensity of the blue color gradient is based on 50% sequence identity. The following protein sequences were aligned and the % identity to MhqR of *S. aureus* is given in parenthesis: MhqR (SACOL2531) of *S. aureus* COL, MhqR (BSU13670) of *B. subtilis* (38.1%), CN491\_21485 of *B. cereus* (43.3%), CN907\_04455 of *B. anthracis* (42.0%), HMPREF9372\_1735 of *Sporosarcina newyorkensis* (43.2%), EF\_1668 of *Enterococcus faecalis* (43.8%), YusO of *Streptococcus pneumoniae* (42.0%), WA34\_10590 of *S. agalactiae* (43.8%), BUZ41\_02330 of *S. haemolyticus* (77.8%), BU121\_11800 of *S. xylosus* (66.7%), A0131\_01385 of *S. saprophyticus* (67.4%) and CP995\_08720 of *Klebsiella pneumoniae* (58.3%). The non-conserved cysteine residues in MhqR homologs are marked in red.



## Figure S3B (continued)

|         |     |                                                                                                                                       |     |
|---------|-----|---------------------------------------------------------------------------------------------------------------------------------------|-----|
| Bs MhqA | 1   | - - - MKVNG IHHVSALTADAQKNLDFYKKVLGLKLVKKS VNQDEPTMYHLFYGDEVANPGTELTFFE                                                               | 63  |
| Sa CatE | 1   | MINNHELLG IHHVTAMTDDAERNYKFFTEVLGMRLVKKTVNQDDIYTYHTFFADDVGSAGTDMTFFD                                                                  | 67  |
| Bs MhqA | 64  | I P R I A P F H A G T N S I S S I G L R V P G T E A L H Y W K E R F E E Q Q V T H S G I S K R A G R D I L A F Q D H E G Q R L V L T A | 130 |
| Sa CatE | 68  | F P N I T K G Q A G T N S I T R P S F R V P N D D A L T Y Y E Q R F D E F G V K H E G I Q E L F G K K V L P F E E V D G Q V Y Q L I S | 134 |
| Bs MhqA | 131 | D E - - E G K G Y G L P V K Q S G I P E E F S F R G L G P V E L T V P Y A E P T L H V L T N I L G F T E I S R E P V E G Q G T A V I L | 195 |
| Sa CatE | 135 | D E L N E G V A P G V P W K N G P V P V D K A I Y G L G P I E I K V S Y F D D F K N I L E T V Y G M T T I A H E - - - - - D N V A L L | 196 |
| Bs MhqA | 196 | E S G E G G A A T E I H L I E R N D L P R E R Q G K G S V H H V A F R V R D E E E L A G W H R I I S R E G F S N S G I V E R Y Y F K A | 262 |
| Sa CatE | 197 | E V G E G G N G G Q V I L I K D D K G P A A R Q G Y G E V H H V S F R V K D H D A I E A W A T K Y K E V G I N N S G I V N R F Y F E A | 263 |
| Bs MhqA | 263 | L Y F R E P N G I L F E L S T D G P G F M V D E N L D E L G Q T I A L P P Y L E H R R A E I E A K L K P I Q - - - - -                 | 316 |
| Sa CatE | 264 | L Y A R V - G H I L I E I S T D G P G F M E D E P Y E T L G E G L S L P P F L E N K R E Y I E S E V R P F N T K R Q H G               | 322 |

**Fig. S3B. Multiple protein sequence alignments of the MhqR and QsrR-regulated phospholipase MhqD and dioxygenases MhqE, CatE and CatE2 of *S. aureus* with homologous enzymes of *B. subtilis*.** The alignment was performed with ClustalΩ2 and is presented in Jalview. Intensity of the blue color gradient is based on 50% sequence identity. The following protein sequences were aligned and the % identity between *S. aureus* and *B. subtilis* enzymes is given in parenthesis: MhqE (SACOL2530) of *S. aureus* COL with MhqE (BSU19570) of *B. subtilis* (35.4%), MhqD (SACOL2529) of *S. aureus* COL with MhqD (BSU19560) of *B. subtilis* (38.8%) and CatE2 (SACOL2533) of *S. aureus* COL with CatE (BSU08240) of *B. subtilis* (34.8%) and CatE (SACOL0408) of *S. aureus* COL with MhqA (BSU12870) of *B. subtilis* (35.4%).
