# Supplementary material for: The MarR-Type Repressor MhqR Confers Quinone and Antimicrobial Resistance in Staphylococcus aureus
Source: PubMed Central journal article supplement (PMC6798810; doi:10.1089/ars.2019.7750), 2019-10-17
Supplement: Supp_Fig4.pdf [file Supp_Fig4.pdf]

Figure S4

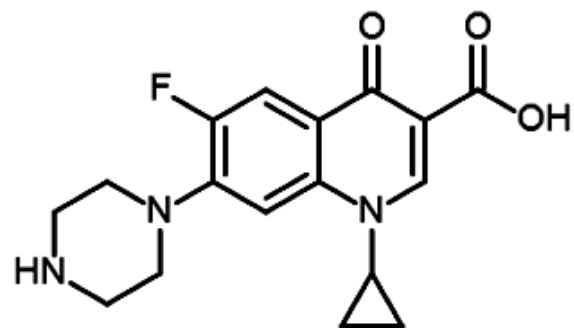

Ciprofloxacin

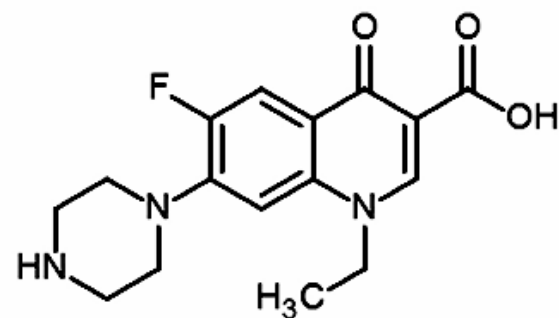

Norfloxacin

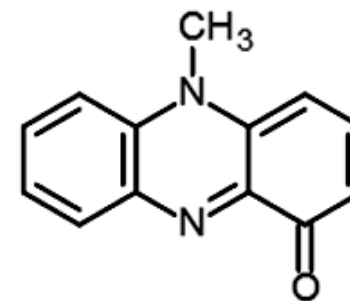

Pyocyanin

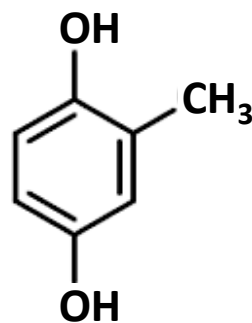

2-Methylhydroquinone

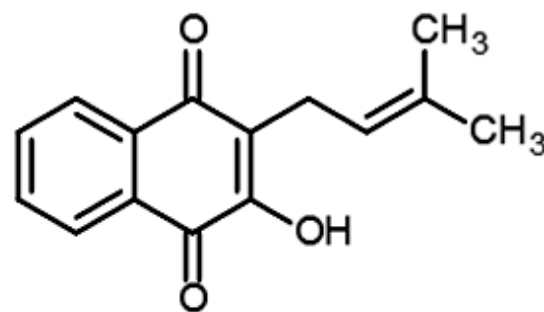

Lapachol

**Fig. S4.** The structures of quinone-derived antimicrobials used in this study. The structures of norfloxacin, ciprofloxacin, pyocyanin, MHQ and lapachol were drawn with 2D Sketcher (ChemDoodle®).
