# Supplementary material for: The MarR-Type Repressor MhqR Confers Quinone and Antimicrobial Resistance in Staphylococcus aureus
Source: PubMed Central journal article supplement (PMC6798810; doi:10.1089/ars.2019.7750), 2019-10-17
Supplement: Supp_Fig6.pdf [file Supp_Fig6.pdf]

Figure S6

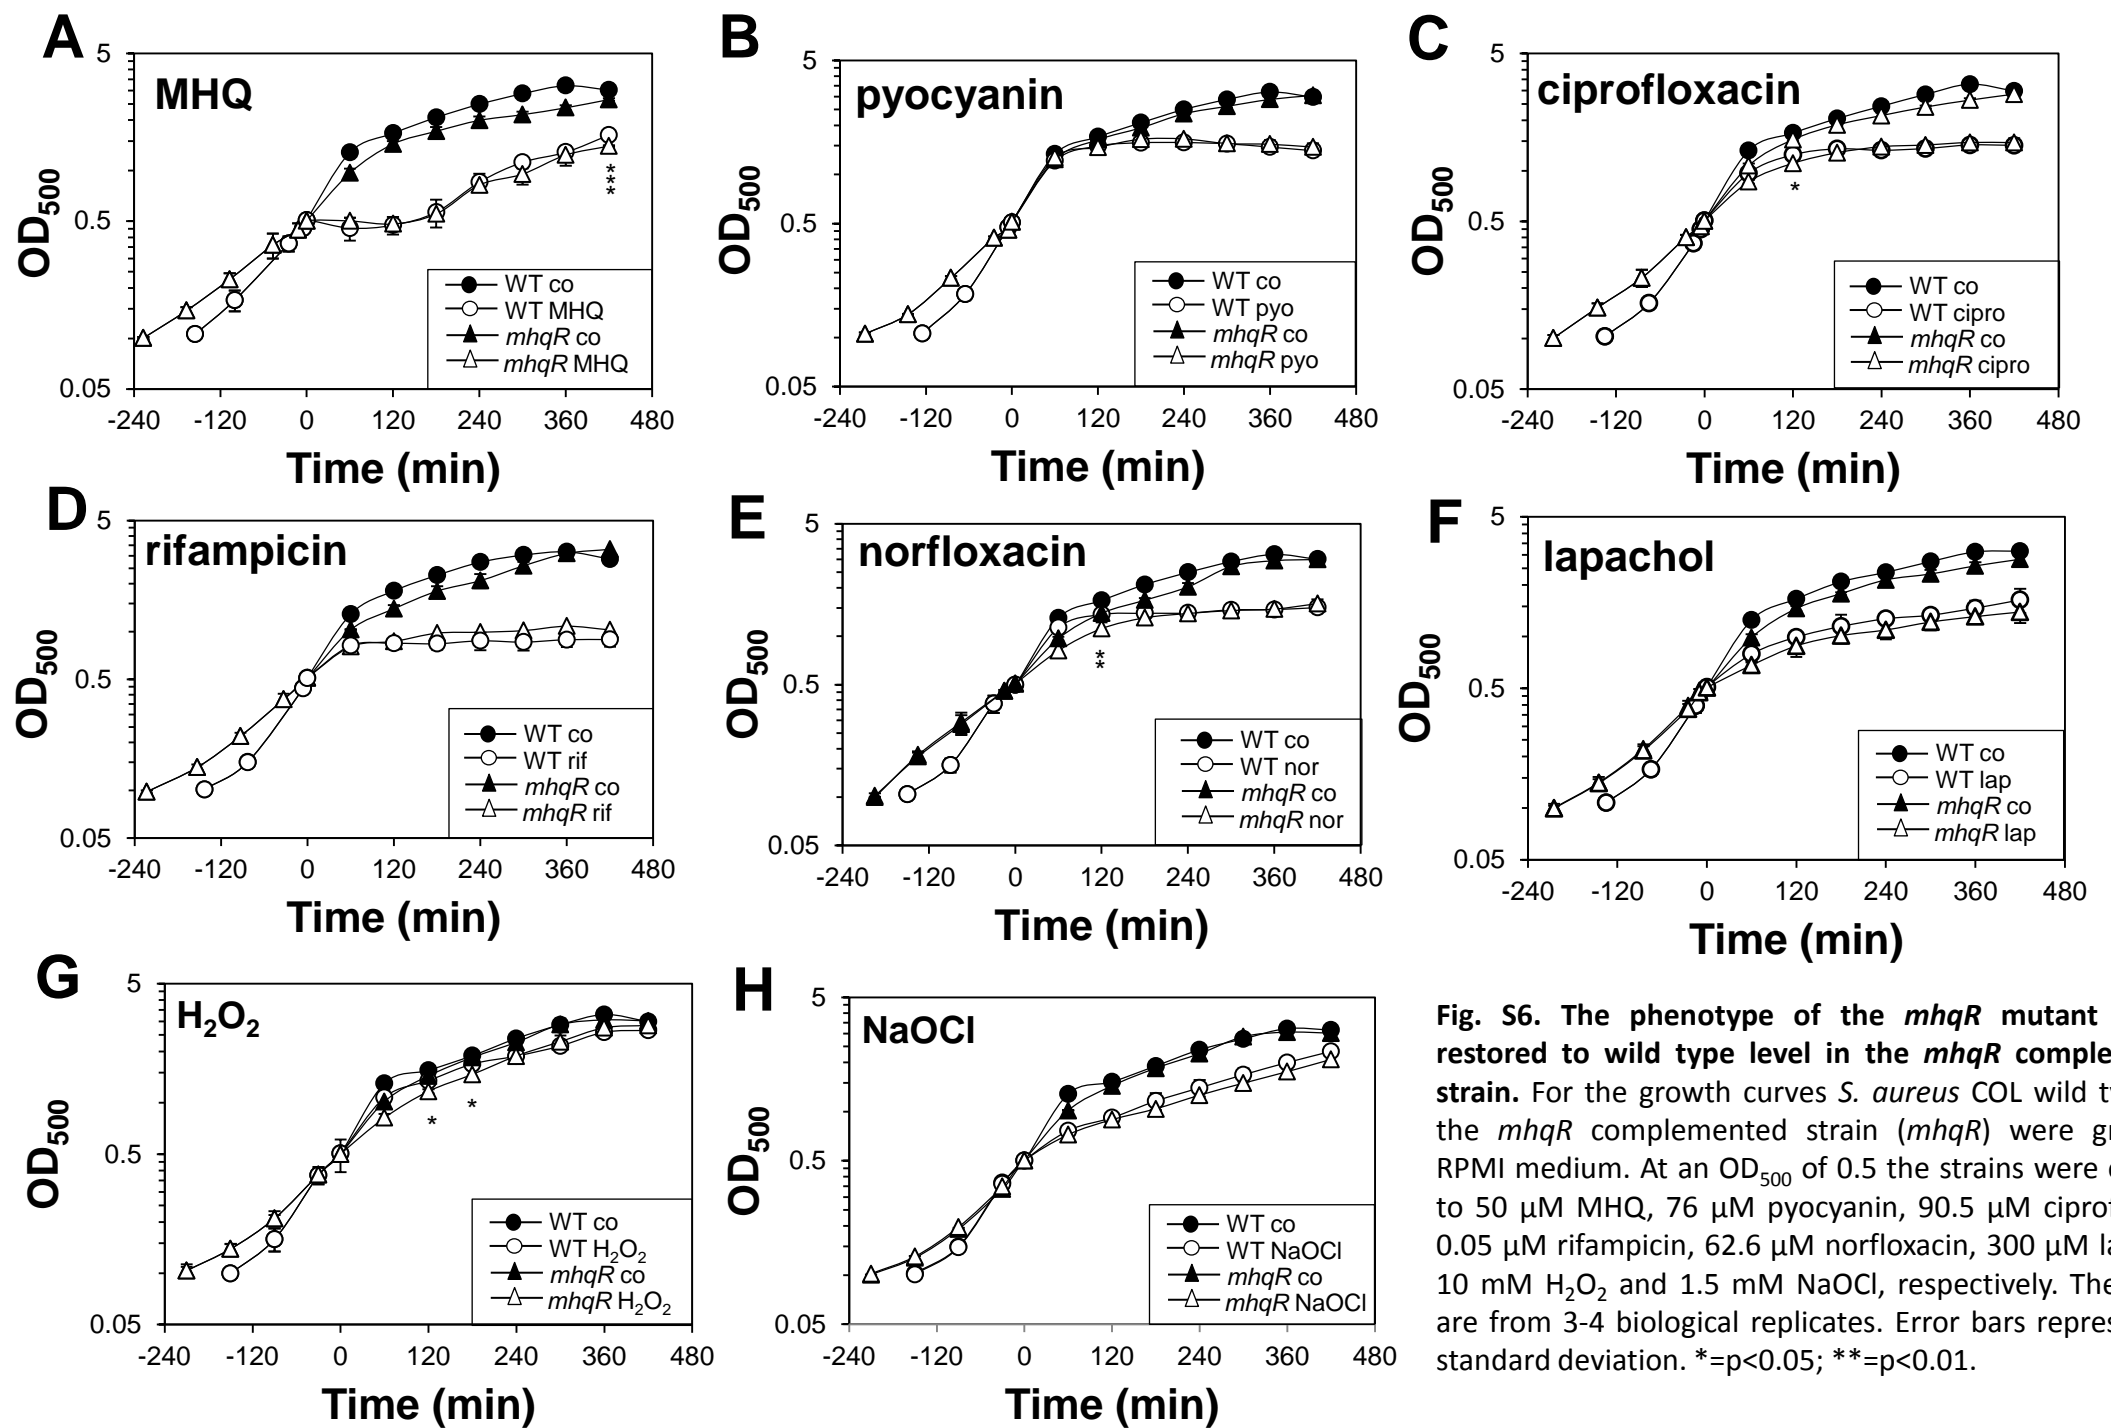

Fig. S6. The phenotype of the *mhqR* mutant can be restored to wild type level in the *mhqR* complemented strain. For the growth curves *S. aureus* COL wild type and the *mhqR* complemented strain (*mhqR*) were grown in RPMI medium. At an OD<sub>500</sub> of 0.5 the strains were exposed to 50 μM MHQ, 76 μM pyocyanin, 90.5 μM ciprofloxacin, 0.05 μM rifampicin, 62.6 μM norfloxacin, 300 μM lapachol, 10 mM H<sub>2</sub>O<sub>2</sub> and 1.5 mM NaOCl, respectively. The results are from 3-4 biological replicates. Error bars represent the standard deviation. \* = p < 0.05; \*\* = p < 0.01.
