# Supplementary material for: The MarR-Type Repressor MhqR Confers Quinone and Antimicrobial Resistance in Staphylococcus aureus
Source: PubMed Central journal article supplement (PMC6798810; doi:10.1089/ars.2019.7750), 2019-10-17
Supplement: Supp_Fig7.pdf [file Supp_Fig7.pdf]

Figure S7

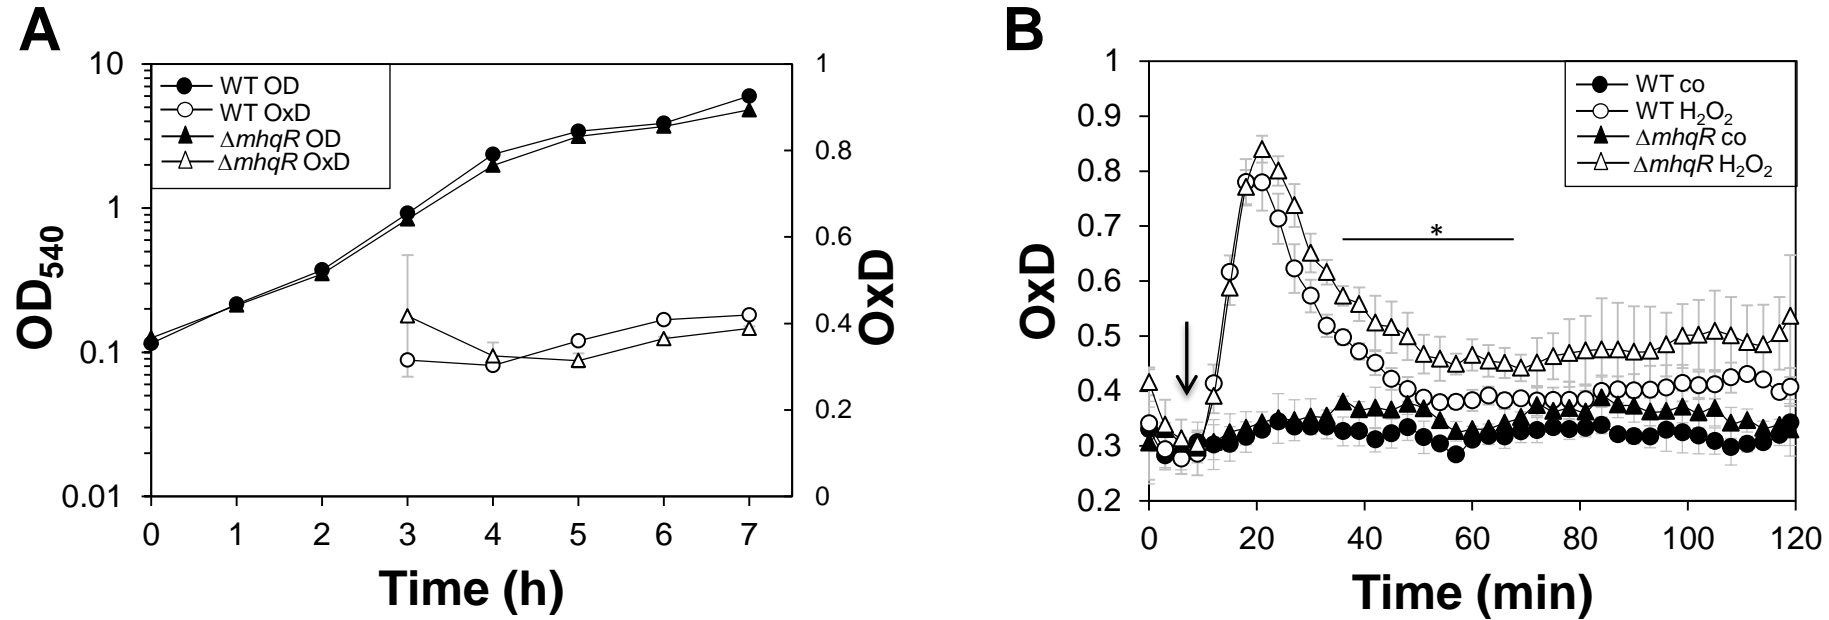

**Fig. S7.** The deletion of *mhqR* does not effect the basal BSH redox potential, but causes a slightly increased H<sub>2</sub>O<sub>2</sub> response of the Brx-roGFP2 biosensor. **(A, B)** The BSH redox potential of the wild type and the *mhqR* mutant was measured with the Brx-roGFP2 biosensor along the growth curve and after exposure to 100 mM H<sub>2</sub>O<sub>2</sub>. The OxD was calculated based on 405/488 nm excitation ratios with emission at 510 nm and related to the fully oxidized and reduced controls. The *mhqR* mutant had a slightly increased biosensor response after exposure to 100 mM H<sub>2</sub>O<sub>2</sub> and a significant delayed recovery of the reduced state. The mean values of four technical and three biological replicates are shown. Error bars represent the standard deviation. \*p<0.05.
