# Supplementary material for: The MarR-Type Repressor MhqR Confers Quinone and Antimicrobial Resistance in Staphylococcus aureus
Source: PubMed Central journal article supplement (PMC6798810; doi:10.1089/ars.2019.7750), 2019-10-17
Supplement: Supp_Fig8.pdf [file Supp_Fig8.pdf]

Figure S8

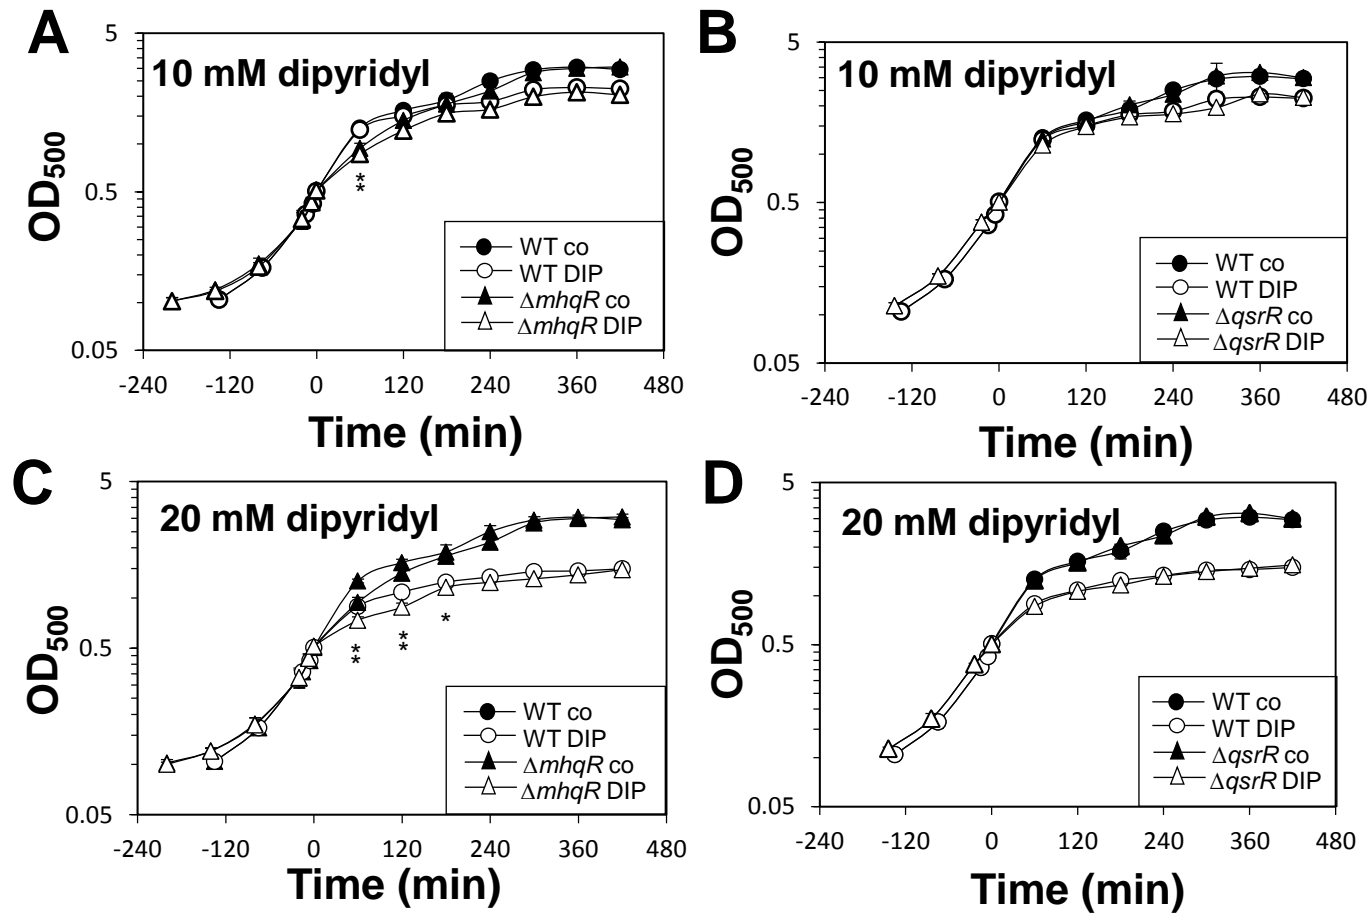

**Fig. S8. The MhqR and QsrR regulons have no functions under iron limitation.** For the growth curves, *S. aureus* COL wild type, the *mhqR* (A, C) and *qsrR* mutants (B, D) were grown in RPMI medium until an OD<sub>500</sub> of 0.5 and treated with 10 mM (A, B) and 20 mM (C, D) of the iron-scavenger 2,2'-dipyridyl (DIP). The growth of the *mhqR* and *qsrR* mutants is not impaired under iron starvation. The results are from three biological replicates. Error bars represent the standard deviation. \*p<0.05.
