# Supplementary material for: The MarR-Type Repressor MhqR Confers Quinone and Antimicrobial Resistance in Staphylococcus aureus
Source: PubMed Central journal article supplement (PMC6798810; doi:10.1089/ars.2019.7750), 2019-10-17
Supplement: Supp_Table2.pdf [file Supp_Table2.pdf]

Table S2: RNA-Seq transcriptome analysis of gene expression changes in *S. aureus* COL wild type and the *mhgR* deletion mutant before and after MHQ stress.

| Gene name               | Region | Locus     | Operon    | log2 fold change (M-value) |       |           |       | Fold changes |       |           |                                        | Function                                                                           |                               |
|-------------------------|--------|-----------|-----------|----------------------------|-------|-----------|-------|--------------|-------|-----------|----------------------------------------|------------------------------------------------------------------------------------|-------------------------------|
|                         |        |           |           | WT MHO                     |       | ΔmhgR MHO |       | WT MHO       |       | ΔmhgR MHO |                                        |                                                                                    |                               |
|                         |        |           |           | WT co                      | MHO   | ΔmhgR co  | MHO   | WT co        | MHO   | ΔmhgR co  | MHO                                    |                                                                                    |                               |
| Amino acid biosynthesis | CodY   | SACOL0302 | bem2      | 1.31                       | 1.02  | 0.94      | 0.65  | 2.48         | 2.03  | 0.52      | 0.64                                   | branched-chain amino acid transport system I carrier protein                       |                               |
| Amino acid biosynthesis | CodY   | SACOL2574 | tdh       | -1.70                      | -0.45 | 0.88      | -0.37 | 0.31         | 0.73  | 1.84      | 0.77                                   | D-isomer specific 2-hydroxyacid dehydrogenase family protein                       |                               |
| Amino acid biosynthesis | CodY   | SACOL2575 | tdh       | -1.96                      | -0.11 | 0.62      | -0.22 | 0.52         | 0.93  | 1.54      | 0.86                                   | N-succinylamino acid aminotransferase                                              |                               |
| Amino acid biosynthesis | CodY   | SACOL2511 | trpE      | 2.75                       | 1.40  | 1.17      | 0.20  | 0.28         | 0.78  | 2.64      | 0.38                                   | lysine-binding protein                                                             |                               |
| Amino acid biosynthesis | CodY   | SACOL1362 | hom       | -1.17                      | -0.28 | 0.63      | 0.03  | 0.44         | 0.67  | 1.55      | 1.02                                   | homoserine dehydrogenase                                                           |                               |
| Amino acid biosynthesis | CodY   | SACOL1363 | hom       | -1.03                      | -0.56 | 0.19      | 0.39  | 0.98         | 0.84  | 1.14      | 1.31                                   | threonine synthase                                                                 |                               |
| Amino acid biosynthesis | CodY   | SACOL1429 | tyrC      | 0.19                       | 0.13  | 0.21      | 0.40  | 0.61         | 0.41  | 0.99      | 1.17                                   | tyrosine aminotransferase                                                          |                               |
| Amino acid biosynthesis | CodY   | SACOL2584 | isaA      | -1.32                      | -0.43 | 0.77      | 0.12  | 0.40         | 0.74  | 1.71      | 0.92                                   | immunodominant antigen A                                                           |                               |
| Amino acid biosynthesis | CodY   | SACOL1428 | lycC      | -2.49                      | -0.47 | 0.65      | -1.22 | 0.18         | 0.72  | 1.57      | 0.43                                   | aspartate kinase                                                                   |                               |
| Amino acid biosynthesis | CodY   | SACOL1429 | lycC      | -2.59                      | -0.33 | 0.18      | -0.09 | 0.93         | 0.80  | 1.13      | 0.50                                   | aspartate semialdehyde dehydrogenase                                               |                               |
| Amino acid biosynthesis | CodY   | SACOL1430 | lycC      | -1.31                      | -0.08 | 0.12      | -1.03 | 0.40         | 0.95  | 1.09      | 0.49                                   | dihydrodipicolinate synthase                                                       |                               |
| Amino acid biosynthesis | CodY   | SACOL1431 | lycC      | -0.71                      | 0.05  | 0.02      | -0.72 | 0.61         | 1.04  | 1.03      | 0.61                                   | dihydrodipicolinate synthase                                                       |                               |
| Amino acid biosynthesis | CodY   | SACOL1432 | phoD      | -0.40                      | -1.13 | -0.11     | -0.61 | 0.76         | 1.09  | 0.99      | 0.93                                   | high affinity proline permease                                                     |                               |
| Amino acid biosynthesis | CodY   | SACOL1363 | trpE      | 1.26                       | 0.39  | 0.42      | 0.44  | 0.42         | 0.75  | 1.34      | 0.74                                   | high affinity proline permease                                                     |                               |
| Amino acid biosynthesis | CodY   | SACOL1817 | rhlB      | 2.54                       | 1.24  | -1.40     | 0.11  | 5.81         | 2.36  | 0.38      | 0.99                                   | rhlB/aiiA synthase beta subunit                                                    |                               |
| Amino acid biosynthesis | CodY   | SACOL1818 | rhlB      | 2.42                       | 1.39  | -1.31     | -0.28 | 5.33         | 2.62  | 0.40      | 0.82                                   | difluoromethyl 3,4-dihydroxy-2-butanone-4-phosphate synthase/GTP cyclohydrolase II |                               |
| Amino acid biosynthesis | CodY   | SACOL1820 | rhlB      | 2.59                       | 1.37  | -1.32     | 0.11  | 6.01         | 2.58  | 0.40      | 0.93                                   | rhlB/aiiA synthase alpha subunit                                                   |                               |
| Amino acid biosynthesis | CodY   | SACOL1820 | rhlB      | 2.58                       | 1.28  | -1.46     | 0.18  | 5.96         | 2.43  | 0.36      | 0.88                                   | diaminohydroxyphosphoribosylaminoimidazole deaminase                               |                               |
| Amino acid biosynthesis | CodY   | SACOL0924 | SACOL0924 | -0.05                      | -0.04 | -0.32     | -0.31 | 0.97         | 0.97  | 0.80      | 0.81                                   | hypothetical protein                                                               |                               |
| Amino acid biosynthesis | CodY   | SACOL0925 | SACOL0925 | 0.49                       | 0.37  | 0.38      | 0.16  | 1.4          | 1.21  | 1.20      | 1.20                                   | hypothetical protein                                                               |                               |
| Amino acid biosynthesis | CodY   | SACOL0926 | SACOL0926 | 0.81                       | 0.36  | -0.52     | 0.08  | 1.75         | 1.28  | 0.70      | 0.95                                   | 5'-nucleotidase                                                                    |                               |
| Amino acid biosynthesis | CodY   | SACOL1365 | SACOL1365 | 0.71                       | 0.55  | 0.02      | 0.13  | 1.64         | 1.46  | 0.99      | 1.09                                   | HAD superfamily hydrolase                                                          |                               |
| Amino acid biosynthesis | CodY   | SACOL1374 | SACOL1374 | 1.24                       | 0.23  | 0.23      | 0.26  | 1.96         | 1.86  | 0.85      | 0.86                                   | HAD superfamily hydrolase                                                          |                               |
| Amino acid biosynthesis | CodY   | SACOL1775 | ptaA      | -1.44                      | -0.64 | 0.81      | 0.01  | 0.37         | 0.64  | 1.75      | 1.01                                   | PTS system, IIBC components                                                        |                               |
| Amino acid biosynthesis | CodY   | SACOL2318 | SACOL2318 | 1.17                       | -0.14 | 1.29      | 0.00  | 2.25         | 0.91  | 0.41      | 1.00                                   | hypothetical protein                                                               |                               |
| Amino acid biosynthesis | CodY   | SACOL0919 | isaA      | 1.82                       | 0.45  | 0.82      | 0.58  | 1.28         | 1.63  | 0.73      | 1.67                                   | amino acid permease                                                                |                               |
| Amino acid biosynthesis | CodY   | SACOL2295 | isaA      | 1.19                       | 1.55  | 0.55      | 0.22  | 2.27         | 2.93  | 1.46      | 1.16                                   | secretory antigen Saa                                                              |                               |
| Amino acid biosynthesis | CodY   | SACOL1477 | ivaI      | -0.36                      | 0.48  | 0.62      | -0.20 | 0.78         | 1.39  | 1.54      | 0.87                                   | threonine ammonia-lyase                                                            |                               |
| Amino acid biosynthesis | CodY   | SACOL1478 | ivaI      | -0.47                      | 0.17  | 0.72      | 0.50  | 0.55         | 0.66  | 0.66      | 1.00                                   | amine dehydrogenase                                                                |                               |
| Amino acid biosynthesis | CodY   | SACOL1403 | trpE      | 1.62                       | 1.09  | 0.02      | 0.38  | 3.08         | 2.13  | 0.99      | 1.30                                   | anthranilate synthase component 1                                                  |                               |
| Amino acid biosynthesis | CodY   | SACOL1404 | trpE      | 0.91                       | 1.15  | 0.22      | 0.05  | 1.88         | 2.22  | 1.16      | 0.97                                   | anthranilate synthase component II                                                 |                               |
| Amino acid biosynthesis | CodY   | SACOL1405 | trpE      | 1.17                       | 0.67  | 0.17      | 0.24  | 2.32         | 1.66  | 1.18      | anthranilate phosphoribosyltransferase |                                                                                    |                               |
| Amino acid biosynthesis | CodY   | SACOL1406 | trpE      | 1.03                       | 0.76  | 0.11      | 0.12  | 2.04         | 1.69  | 0.93      | indole-3-pyruvate synthase             |                                                                                    |                               |
| Amino acid biosynthesis | CodY   | SACOL1407 | trpE      | 1.89                       | 0.69  | 0.41      | 0.57  | 3.71         | 1.61  | 0.75      | 1.48                                   | N <sup>5</sup> -phosphoribosylanthranilate isomerase                               |                               |
| Amino acid biosynthesis | CodY   | SACOL1408 | trpE      | 1.29                       | 0.59  | -0.21     | 0.02  | 2.02         | 1.83  | 1.09      | 1.09                                   | tryptophan synthase subunit beta                                                   |                               |
| Amino acid biosynthesis | CodY   | SACOL1409 | trpA      | 1.29                       | 0.49  | -0.54     | 0.22  | 2.45         | 1.40  | 0.69      | 1.16                                   | tryptophan synthase subunit alpha                                                  |                               |
| Amino acid biosynthesis | CodY   | SACOL1401 | trpA      | 1.26                       | 1.19  | 0.13      | 0.17  | 2.40         | 2.28  | 1.09      | 1.11                                   | phenylalanine dehydrogenase                                                        |                               |
| Amino acid biosynthesis | CodY   | SACOL1402 | trpA      | 0.68                       | 0.31  | -0.48     | 0.24  | 1.60         | 1.44  | 0.71      | 1.17                                   | metallo-beta-lactamase                                                             |                               |
| Amino acid biosynthesis | CodY   | SACOL0928 | trpE      | 1.27                       | 0.63  | 0.84      | 0.56  | 1.93         | 1.49  | 1.13      | 1.13                                   | tryptophan synthase alpha subunit                                                  |                               |
| Amino acid utilization  | ArcA   | SACOL0786 | arcA      | 1.43                       | 0.93  | 0.61      | 0.61  | 2.09         | 1.49  | 0.83      | 0.83                                   | phosphoenolpyruvate carboxyltransferase                                            |                               |
| Ammonium biosynthesis   | ArcR   | SACOL2654 | arcC      | -1.64                      | -0.87 | 0.00      | 0.13  | 0.32         | 0.55  | 1.87      | 1.09                                   | carbamate kinase                                                                   |                               |
| Ammonium biosynthesis   | ArcR   | SACOL2655 | arcC      | -0.94                      | -0.48 | 0.86      | 0.12  | 0.52         | 0.74  | 1.28      | 0.92                                   | AHC family amino acid polyamine-ornithine transporter                              |                               |
| Ammonium biosynthesis   | ArcR   | SACOL2656 | arcC      | -0.94                      | -0.86 | 0.75      | 0.60  | 1.60         | 1.02  | 1.66      | 1.00                                   | hydroxyethylamine dehydrogenase                                                    |                               |
| Ammonium biosynthesis   | ArcR   | SACOL2657 | arcC      | -1.38                      | -0.94 | 1.30      | 0.95  | 0.10         | 0.52  | 2.46      | 0.52                                   | arginase deaminase                                                                 |                               |
| Ammonium biosynthesis   | ArcR   | SACOL2653 | arcR      | -1.72                      | -0.51 | 0.96      | 0.90  | 0.50         | 0.57  | 1.96      | 1.04                                   | Ctp/Trk family transcriptional regulator                                           |                               |
| Ammonium biosynthesis   | ArcR   | SACOL0167 | argB      | 0.58                       | 0.07  | 0.47      | 0.16  | 0.67         | 1.05  | 1.39      | 1.90                                   | acetylglutamate kinase                                                             |                               |
| Ammonium biosynthesis   | ArcR   | SACOL0168 | argB      | 0.88                       | -0.04 | 0.36      | 0.45  | 0.54         | 0.97  | 1.28      | 0.73                                   | glutamate N acetyltransferase                                                      |                               |
| Ammonium biosynthesis   | ArcR   | SACOL0169 | argB      | -1.48                      | -0.10 | 0.79      | -0.48 | 0.36         | 0.93  | 1.73      | 0.72                                   | N acetyl-gamma-glutamyl phosphate reductase                                        |                               |
| Ammonium biosynthesis   | ArcR   | SACOL0170 | argB      | -1.49                      | -0.35 | 0.93      | 0.57  | 0.88         | 1.14  | 1.43      | 1.43                                   | glutamate-oxaloacetate transaminase                                                |                               |
| Ammonium biosynthesis   | ArcR   | SACOL0963 | argH      | -4.94                      | -2.24 | 0.04      | 0.54  | 0.07         | 0.21  | 1.03      | 0.69                                   | argininosuccinate lyase                                                            |                               |
| Ammonium biosynthesis   | ArcR   | SACOL0964 | argH      | -4.95                      | -2.48 | 0.19      | 0.38  | 0.03         | 0.16  | 0.88      | 0.47                                   | argininosuccinate synthase                                                         |                               |
| Ammonium biosynthesis   | ArcR   | SACOL1915 | argH      | -1.95                      | -0.88 | 0.97      | 0.17  | 0.64         | 1.56  | 0.24      | 1.84                                   | glutamate ABC transporter, ATP-binding protein                                     |                               |
| Ammonium biosynthesis   | ArcR   | SACOL1916 | argM      | -2.93                      | -0.91 | 0.97      | 0.43  | 0.13         | 0.53  | 1.96      | 0.74                                   | amino acid ABC transporter, membrane protein                                       |                               |
| Ammonium biosynthesis   | ArcR   | SACOL2632 | argT      | -2.52                      | -1.84 | 1.58      | 0.08  | 0.09         | 0.28  | 2.99      | 0.95                                   | BCT1 family beta-caranine/choline transporter                                      |                               |
| Ammonium metabolism     | FruR   | SACOL0787 | fruA      | 0.22                       | 0.07  | 0.24      | 0.23  | 1.05         | 1.18  | 1.07      | 1.07                                   | DexA family transcriptional regulator                                              |                               |
| Ammonium metabolism     | FruR   | SACOL0788 | fruA      | 0.18                       | -0.43 | 0.04      | 0.57  | 2.08         | 1.35  | 1.03      | 1.48                                   | 1-phosphoglucohydrolase                                                            |                               |
| Ammonium metabolism     | FruR   | SACOL1328 | glpA      | -0.77                      | -0.61 | -0.21     | -0.37 | 0.59         | 0.66  | 0.86      | 0.71                                   | glutamate-ammonia lyase repressor                                                  |                               |
| Ammonium metabolism     | FruR   | SACOL1329 | glpA      | -0.68                      | -0.26 | 0.31      | 0.63  | 0.89         | 0.66  | 1.07      | 1.07                                   | glutamate-ammonia lyase                                                            |                               |
| Antibiotics resistance  | VraSR  | SACOL2485 | vraS      | -1.15                      | -0.51 | 0.54      | 0.11  | 0.45         | 0.70  | 1.45      | 0.93                                   | glycerate kinase                                                                   |                               |
| Antibiotics resistance  | VraSR  | SACOL2486 | vraS      | -1.05                      | -0.54 | 0.47      | 0.10  | 0.48         | 0.69  | 1.39      | 0.97                                   | hypothetical protein                                                               |                               |
| Antibiotics resistance  | VraSR  | SACOL1894 | vraS      | -0.59                      | -0.29 | 0.45      | 0.46  | 0.65         | 1.17  | 1.75      | 1.07                                   | phosphorylase isomerase                                                            |                               |
| Antibiotics resistance  | VraSR  | SACOL1932 | vraS      | -1.36                      | -0.59 | 0.70      | 0.06  | 0.39         | 0.66  | 1.62      | 0.96                                   | monofunctional glycosyltransferase                                                 |                               |
| Antibiotics resistance  | VraSR  | SACOL1942 | vraS      | 1.46                       | 0.73  | -0.64     | 0.07  | 2.75         | 1.66  | 0.64      | 1.05                                   | response regulator VraR                                                            |                               |
| Antibiotics resistance  | VraSR  | SACOL1943 | vraS      | 1.65                       | 0.65  | -0.61     | 0.67  | 0.66         | 0.67  | 1.02      | 1.05                                   | phosphonate kinase VraS                                                            |                               |
| Antibiotics resistance  | VraSR  | SACOL1944 | vraS      | 1.05                       | 0.62  | -0.39     | 0.03  | 2.08         | 1.54  | 0.76      | 1.02                                   | hypothetical membrane protein                                                      |                               |
| Antibiotics resistance  | VraSR  | SACOL1945 | vraS      | 0.93                       | 0.49  | -0.37     | 0.06  | 1.91         | 1.40  | 0.77      | 1.04                                   | hypothetical protein                                                               |                               |
| Cell wall biosynthesis  | CitR   | SACOL2198 | budA1     | 2.77                       | 1.61  | 1.68      | 0.88  | 6.83         | 2.41  | 0.48      | 1.80                                   | antibiotec deacetylase                                                             |                               |
| Cell wall biosynthesis  | CitR   | SACOL2199 | budA1     | 2.75                       | 1.35  | 1.72      | 0.10  | 1.57         | 2.55  | 0.65      | 0.65                                   | 1.07                                                                               | phosphorylase isomerase       |
| Cell wall biosynthesis  | CitR   | SACOL2533 | cidC      | 2.00                       | 0.62  | -1.02     | 0.58  | 1.58         | 1.33  | 0.48      | 1.46                                   | pyruvate oxidase                                                                   |                               |
| Cell wall biosynthesis  | CitR   | SACOL2534 | cidC      | 2.77                       | 0.77  | -0.29     | 0.80  | 0.84         | 0.80  | 0.72      | 0.72                                   | 1.45                                                                               | hypothetical membrane protein |
| Cell wall biosynthesis  | GrxR   | SACOL0921 | igppQ     | 1.47                       | 0.77  | 0.73      | 0.93  | 1.78         | 1.78  | 0.77      | 0.77                                   | acetylphosphotransferase/phenolphosphatase                                         |                               |
| Cell wall biosynthesis  | GrxR   | SACOL2129 | docE2     | 1.40                       | 2.32  | 1.19      | 0.26  | 2.65         | 4.99  | 2.28      | 1.20                                   | tyrosine phosphatase aldolase                                                      |                               |
| Cell wall biosynthesis  | GrxR   | SACOL1743 | zapa      | -0.84                      | -0.05 | 0.55      | -0.24 | 0.56         | 0.97  | 1.46      | 0.85                                   | AHC family amino acid polyamine-ornithine transporter                              |                               |
| Cell wall biosynthesis  | GrxR   | SACOL1744 | zapa      | -0.84                      | -0.05 | 0.55      | -0.24 | 0.56         | 0.97  | 1.46      | 0.85                                   | AHC family amino acid polyamine-ornithine transporter                              |                               |
| Cell wall biosynthesis  | GrxR   | SACOL1761 | ackA      | 2.28                       | 1.75  | -1.14     | -0.58 | 4.85         | 3.36  | 0.45      | 0.67                                   | hypothetical protein                                                               |                               |
| Cell wall biosynthesis  | GrxR   | SACOL0190 | aqdD      | 7.79                       | 5.38  | -1.31     | 1.05  | 221.15       | 41.64 | 4.60      | 2.07                                   | zinc oxidase                                                                       |                               |
| Cell wall biosynthesis  | GrxR   | SACOL0191 | aqdD      | 6.95                       | 4.97  | -1.57     | 0.95  | 21.52        | 3.95  | 0.96      | 1.66                                   | alcohol dehydrogenase                                                              |                               |
| Cell wall biosynthesis  | GrxR   | SACOL2192 | alrSf     | 1.78                       | 0.66  | -1.11     | -0.01 | 3.43         | 1.58  | 0.46      | 0.99                                   | oxidoreductase, aldo/keto reductase                                                |                               |
| Cell wall biosynthesis  | GrxR   | SACOL2094 | atpC      | -0.86                      | -0.82 | 0.25      | 0.01  | 0.55         | 0.65  | 1.19      | 1.01                                   | proton-translocating F <sub>1</sub> F <sub>0</sub> ATPase epsilon subunit          |                               |
| Cell wall biosynthesis  | GrxR   | SACOL2095 | atpC      | -0.86                      | -0.82 | 0.25      | 0.01  | 0.55         | 0.65  | 1.19      | 1.01                                   | proton-translocating F <sub>1</sub> F <sub>0</sub> ATPase epsilon subunit          |                               |
| Cell wall biosynthesis  | GrxR   | SACOL2096 | atpG      | -1.14                      | -0.80 | 0.54      | 0.19  | 0.45         | 0.57  | 1.45      | 1.14                                   | proton-translocating F <sub>1</sub> F <sub>0</sub> ATPase alpha subunit            |                               |
| Cell wall biosynthesis  | GrxR   | SACOL2097 | atpA      | -1.13                      | -0.59 | 0.61      | 0.06  | 0.46         | 0.66  | 1.53      | 1.04                                   | proton-translocating F <sub>1</sub> F <sub>0</sub> ATPase alpha subunit            |                               |
| Cell wall biosynthesis  | GrxR   | SACOL2098 | atpA      | -1.13                      | -0.59 | 0.61      | 0.06  | 0.46         | 0.66  | 1.53      | 1.04                                   | proton-translocating F <sub>1</sub> F <sub>0</sub> ATPase alpha subunit            |                               |
| Cell wall biosynthesis  | GrxR   | SACOL2099 | atpF      | -1.03                      | -0.72 | 0.47      | 0.16  | 0.49         | 0.61  | 1.39      | 1.12                                   | proton-translocating F <sub>1</sub> F <sub>0</sub> ATPase subunit B                |                               |
| Cell wall biosynthesis  | GrxR   | SACOL2100 | atpE      | -0.99                      | -0.86 | 0.40      | 0.26  | 0.50         | 0.55  | 1.32      | 1.20                                   | proton-translocating F <sub>1</sub> F <sub>0</sub> ATPase epsilon subunit C        |                               |

| Function                | Region | Gene      | Dysregulation           | Gene symbol | log2-fold change (M-value) |                       |                      |                  | Fold changes    |                       |                      |                                                  | Function                                                              |
|-------------------------|--------|-----------|-------------------------|-------------|----------------------------|-----------------------|----------------------|------------------|-----------------|-----------------------|----------------------|--------------------------------------------------|-----------------------------------------------------------------------|
|                         |        |           |                         |             | WT MND3 / WT co            | Δmsh2 MND3 / Δmsh2 co | Δmsh2 MND3 / WT MND3 | Δmsh2 co / WT co | WT MND3 / WT co | Δmsh2 MND3 / Δmsh2 co | Δmsh2 MND3 / WT MND3 | Δmsh2 co / WT co                                 |                                                                       |
| Cell wall biosynthesis  | GraRS  | SACOL2451 | opuCD opuCC opuCB opuCA | opuCC       | 2.16                       | 1.59                  | -1.37                | -0.77            | 4.46            | 3.01                  | 0.39                 | 0.59                                             | glycine betaine/L-proline ABC transporter, binding protein            |
| Cell wall biosynthesis  | GraRS  | SACOL2452 | opuCD opuCC opuCB opuCA | opuCB       | 2.17                       | 1.32                  | -1.45                | -0.58            | 4.50            | 2.50                  | 0.37                 | 0.67                                             | glycine betaine/choline ABC transporter, membrane protein             |
| Cell wall biosynthesis  | GraRS  | SACOL2453 | opuCD opuCC opuCB opuCA | opuCA       | 1.78                       | 1.38                  | -1.14                | -0.71            | 3.44            | 2.60                  | 0.40                 | 0.61                                             | glycine betaine/choline ABC transporter, ATP-binding protein          |
| Cell wall biosynthesis  | GraRS  | SACOL2454 | opuCD opuCC opuCB opuCA | opuB        | 1.12                       | 0.93                  | -0.95                | -0.25            | 0.25            | 0.85                  | 1.27                 | 0.85                                             | NCS1 family nucleobase/uracil transporter 2                           |
| Cell wall biosynthesis  | GraRS  | SACOL2128 | pdp                     | pdp         | 1.30                       | 1.81                  | 0.80                 | 0.28             | 2.46            | 3.51                  | 1.74                 | 1.21                                             | pyrimidine nucleoside phosphorylase                                   |
| Cell wall biosynthesis  | GraRS  | SACOL0125 | phnE1 phnE2 phnC phnD   | phnE1       | -0.42                      | -0.12                 | -0.25                | -0.41            | 0.75            | 0.92                  | 0.84                 | 0.75                                             | phosphonate ABC transporter, permease                                 |
| Cell wall biosynthesis  | GraRS  | SACOL0126 | phnE1 phnE2 phnC phnD   | phnE2       | 0.61                       | 0.63                  | -0.56                | -0.34            | 0.56            | 0.86                  | 0.96                 | 0.69                                             | phosphonate ABC transporter, permease                                 |
| Cell wall biosynthesis  | GraRS  | SACOL0127 | phnE1 phnE2 phnC phnD   | phnC        | -0.79                      | -0.16                 | -0.55                | -0.04            | 0.58            | 0.90                  | 1.46                 | 0.97                                             | phosphonate ABC transporter, ATP-binding protein                      |
| Cell wall biosynthesis  | GraRS  | SACOL0128 | phnE1 phnE2 phnC phnD   | phnD        | -2.00                      | -0.46                 | -1.04                | -0.37            | 0.25            | 0.73                  | 2.06                 | 0.77                                             | phosphonate ABC transporter, phosphate-binding protein                |
| Cell wall biosynthesis  | GraRS  | SACOL0272 | ptaA                    | ptaA        | 1.72                       | 0.12                  | -0.13                | -0.55            | 3.30            | 1.59                  | 0.29                 | 1.68                                             | DNA repair protein RecA                                               |
| Cell wall biosynthesis  | GraRS  | SACOL0573 | ptaP                    | ptaP        | 0.86                       | -0.17                 | -1.95                | -0.93            | 1.82            | 0.89                  | 0.76                 | 0.52                                             | intralumenal membrane protein (PIN domain superfamily)                |
| Cell wall biosynthesis  | GraRS  | SACOL2518 | repE                    | repE        | -0.85                      | 0.34                  | -0.17                | -1.33            | 0.55            | 1.27                  | 0.89                 | 0.40                                             | hypothetical protein                                                  |
| Cell wall biosynthesis  | GraRS  | SACOL0077 | SACOL0077               | SACOL0077   | 0.72                       | -0.30                 | -0.52                | -0.51            | 0.61            | 0.81                  | 1.01                 | 1.01                                             | hypothetical membrane protein                                         |
| Cell wall biosynthesis  | GraRS  | SACOL0259 | SACOL0259               | SACOL0259   | -1.01                      | -1.27                 | -0.09                | -0.16            | 0.50            | 0.41                  | 0.94                 | 1.12                                             | hypothetical protein                                                  |
| Cell wall biosynthesis  | GraRS  | SACOL0283 | SACOL0283               | SACOL0283   | -2.06                      | -0.84                 | 0.55                 | -0.63            | 0.24            | 0.56                  | 1.46                 | 0.65                                             | hypothetical membrane protein                                         |
| Cell wall biosynthesis  | GraRS  | SACOL0300 | SACOL0300               | SACOL0300   | 1.77                       | -1.51                 | 0.20                 | -0.66            | 0.29            | 0.35                  | 1.25                 | 0.96                                             | hypothetical membrane protein                                         |
| Cell wall biosynthesis  | GraRS  | SACOL0466 | SACOL0466 SACOL0467     | SACOL0466   | 1.52                       | 0.91                  | -2.30                | 0.20             | 11.44           | 1.88                  | 0.20                 | 1.15                                             | hypothetical membrane protein                                         |
| Cell wall biosynthesis  | GraRS  | SACOL0467 | SACOL0466 SACOL0467     | SACOL0467   | 3.35                       | 0.74                  | -2.40                | -0.12            | 10.22           | 1.67                  | 0.19                 | 1.09                                             | hypothetical protein                                                  |
| Cell wall biosynthesis  | GraRS  | SACOL0551 | SACOL0551 SACOL0552     | SACOL0551   | 1.29                       | 0.34                  | -0.59                | 0.08             | 2.02            | 1.27                  | 0.66                 | 1.06                                             | hypothetical protein                                                  |
| Cell wall biosynthesis  | GraRS  | SACOL0552 | SACOL0551 SACOL0552     | SACOL0552   | 0.98                       | 0.74                  | 0.47                 | -0.21            | 1.97            | 1.67                  | 0.72                 | 0.86                                             | hypothetical membrane protein                                         |
| Cell wall biosynthesis  | GraRS  | SACOL0606 | SACOL0606 aot1          | SACOL0606   | 0.08                       | 1.49                  | 0.27                 | 0.55             | 1.25            | 2.81                  | 2.60                 | 0.50                                             | hypothetical protein                                                  |
| Cell wall biosynthesis  | GraRS  | SACOL0607 | SACOL0606 aot1          | aot1        | 0.60                       | 1.49                  | 1.07                 | 0.21             | 1.52            | 2.81                  | 2.10                 | 1.16                                             | hypothetical protein                                                  |
| Cell wall biosynthesis  | GraRS  | SACOL0849 | SACOL0849 SACOL0850     | SACOL0849   | -1.91                      | -0.53                 | -0.19                | -1.49            | 0.27            | 0.69                  | 0.88                 | 0.36                                             | hypothetical protein                                                  |
| Cell wall biosynthesis  | GraRS  | SACOL0850 | SACOL0849 SACOL0850     | SACOL0850   | 1.20                       | 0.34                  | -0.59                | 0.08             | 2.02            | 1.27                  | 0.66                 | 1.06                                             | hypothetical protein                                                  |
| Cell wall biosynthesis  | GraRS  | SACOL0851 | SACOL0851               | SACOL0851   | -2.51                      | -0.61                 | -0.56                | -2.82            | 0.18            | 0.66                  | 0.68                 | 0.19                                             | hypothetical lipoprotein                                              |
| Cell wall biosynthesis  | GraRS  | SACOL1005 | SACOL1004 pepF          | pepF        | 1.37                       | 1.76                  | 0.01                 | -0.37            | 2.58            | 3.39                  | 0.99                 | 0.77                                             | M03 family oligopeptidase F                                           |
| Cell wall biosynthesis  | GraRS  | SACOL1225 | SACOL1225               | SACOL1225   | -1.06                      | 0.50                  | -0.49                | -1.26            | 0.48            | 1.41                  | 1.14                 | 0.42                                             | hypothetical protein                                                  |
| Cell wall biosynthesis  | GraRS  | SACOL1333 | SACOL1333               | SACOL1333   | 1.93                       | 0.92                  | -0.12                | -0.37            | 3.19            | 0.71                  | 1.38                 | 0.97                                             | hypothetical protein                                                  |
| Cell wall biosynthesis  | GraRS  | SACOL1456 | SACOL1456 err           | err         | 1.97                       | 0.48                  | -0.98                | 0.44             | 3.92            | 1.39                  | 0.49                 | 1.36                                             | hypothetical protein                                                  |
| Cell wall biosynthesis  | GraRS  | SACOL1457 | SACOL1456 err           | err         | 1.88                       | 0.47                  | -0.98                | 0.42             | 3.69            | 1.39                  | 0.51                 | 1.34                                             | PTS family glucose/glucose 6-phosphate porter component BA            |
| Cell wall biosynthesis  | GraRS  | SACOL1902 | SACOL1902 SACOL1903     | SACOL1902   | 1.93                       | 0.91                  | -0.20                | -0.20            | 3.20            | 1.42                  | 0.90                 | 1.02                                             | hypothetical protein                                                  |
| Cell wall biosynthesis  | GraRS  | SACOL1903 | SACOL1902 SACOL1903     | SACOL1903   | 0.63                       | -0.13                 | 0.61                 | 0.09             | 0.64            | 0.91                  | 1.53                 | 1.06                                             | hypothetical protein                                                  |
| Cell wall biosynthesis  | GraRS  | SACOL2127 | SACOL2127               | SACOL2127   | 0.99                       | -1.27                 | 0.62                 | 0.33             | 1.98            | 2.41                  | 1.54                 | 1.26                                             | hypothetical membrane protein                                         |
| Cell wall biosynthesis  | GraRS  | SACOL2252 | SACOL2252               | SACOL2252   | 1.31                       | 0.25                  | -0.75                | -0.40            | 2.40            | 0.90                  | 0.80                 | 0.57                                             | possible H4D superfamily hydrolase                                    |
| Cell wall biosynthesis  | GraRS  | SACOL2252 | SACOL2252 hemK          | hemK        | 0.81                       | -0.11                 | -0.78                | 0.12             | 1.75            | 0.93                  | 0.58                 | 1.09                                             | RND resistance-nucleation-cell division acriflavine/proton antiporter |
| Cell wall biosynthesis  | GraRS  | SACOL2253 | SACOL2252 hemK          | hemK        | 0.26                       | -0.25                 | -0.53                | -0.03            | 1.20            | 0.84                  | 0.69                 | 0.98                                             | peptidoglycan pentapeptide interdivisive biosynthesis protein FmB8    |
| Cell wall biosynthesis  | GraRS  | SACOL2344 | SACOL2343 SACOL2344     | SACOL2343   | 1.53                       | 0.29                  | -1.93                | -1.48            | 1.34            | 1.87                  | 1.08                 | 1.13                                             | RND resistance-nucleation-cell division acriflavine/proton antiporter |
| Cell wall biosynthesis  | GraRS  | SACOL2344 | SACOL2343 SACOL2344     | SACOL2344   | 1.32                       | 0.33                  | -1.09                | -1.10            | 2.49            | 1.26                  | 0.47                 | 0.93                                             | hypothetical protein                                                  |
| Cell wall biosynthesis  | GraRS  | SACOL2430 | SACOL2430 mshA3         | mshA3       | 0.59                       | 0.91                  | -0.10                | -0.35            | 1.51            | 1.88                  | 0.93                 | 0.78                                             | ABC transporter, ATP-binding protein                                  |
| Cell wall biosynthesis  | GraRS  | SACOL2431 | SACOL2430 mshA3         | mshA3       | 1.09                       | 0.32                  | 0.58                 | 0.44             | 1.64            | 1.17                  | 0.84                 | 0.61                                             | ABC transporter, ATP-binding protein                                  |
| Cell wall biosynthesis  | GraRS  | SACOL2477 | SACOL2477 hmo dafP      | SACOL2477   | 1.62                       | 2.11                  | -1.11                | -0.77            | 12.33           | 4.32                  | 0.46                 | 1.29                                             | hypothetical protein                                                  |
| Cell wall biosynthesis  | GraRS  | SACOL2478 | SACOL2477 hmo dafP      | hmoD        | 4.64                       | 1.88                  | -1.88                | -0.68            | 26.97           | 3.68                  | 0.27                 | 1.40                                             | rRNA methyltransferase FmO                                            |
| Cell wall biosynthesis  | GraRS  | SACOL2479 | SACOL2477 hmo dafP      | dafP        | 4.08                       | 2.16                  | -1.82                | -0.90            | 25.90           | 4.67                  | 0.31                 | 1.46                                             | hypothetical protein                                                  |
| Cell wall biosynthesis  | GraRS  | SACOL2522 | SACOL2522               | SACOL2522   | 1.71                       | 0.54                  | -2.00                | -1.46            | 3.27            | 1.45                  | 0.14                 | 0.36                                             | alkaline phosphatase                                                  |
| Cell wall biosynthesis  | GraRS  | SACOL2582 | SACOL2582               | SACOL2582   | -1.23                      | 0.12                  | 1.62                 | 0.28             | 0.43            | 1.09                  | 1.07                 | 1.21                                             | possible acetyltransferase                                            |
| Cell wall biosynthesis  | GraRS  | SACOL2584 | SCN 2                   | SCN 2       | 0.75                       | -0.91                 | 0.17                 | 0.33             | 0.93            | 1.33                  | 1.24                 | 1.34                                             | Mark3/4 family transcriptional regulator                              |
| Cell wall biosynthesis  | GraRS  | SACOL2608 | SCN 2                   | SCN 2       | -1.05                      | -1.04                 | -0.14                | -0.59            | 0.48            | 0.49                  | 0.91                 | 0.94                                             | hypothetical protein                                                  |
| Cell wall biosynthesis  | GraRS  | SACOL0816 | SecA                    | SecA        | 0.98                       | 0.00                  | -0.40                | -0.19            | 1.98            | 1.29                  | 0.57                 | 0.88                                             | Sec Type 1 general secretory pathway prepore translocase SecA         |
| Cell wall biosynthesis  | GraRS  | SACOL1005 | SecY                    | SecY        | 2.35                       | -0.65                 | -0.23                | -0.23            | 4.20            | 0.39                  | 0.20                 | 1.20                                             | secretory antigen secretion factor SecY                               |
| Cell wall biosynthesis  | GraRS  | SACOL1891 | TRAP                    | TRAP        | 2.85                       | 1.68                  | -1.50                | -0.31            | 7.19            | 3.10                  | 0.35                 | 0.81                                             | RNAi-activating protein TRAP                                          |
| Cell wall biosynthesis  | GraRS  | SACOL2550 | traX 6 SACOL2551        | traX 6      | 3.74                       | 0.43                  | -2.07                | -0.72            | 13.40           | 1.39                  | 0.19                 | 1.65                                             | possible thiorodanin                                                  |
| Cell wall biosynthesis  | GraRS  | SACOL2551 | traX 6 SACOL2551        | SACOL2551   | 4.43                       | 0.47                  | -2.07                | -0.67            | 14.29           | 1.32                  | 0.27                 | 1.99                                             | possible thiorodanin                                                  |
| Cell wall biosynthesis  | GraRS  | SACOL2280 | ureABCDFG               | ureA        | 1.97                       | 0.29                  | -2.16                | -0.36            | 3.93            | 1.22                  | 0.22                 | 0.78                                             | urease gamma subunit                                                  |
| Cell wall biosynthesis  | GraRS  | SACOL2281 | ureABCDFG               | ureB        | 1.73                       | 0.22                  | -2.12                | -0.52            | 3.33            | 1.16                  | 0.23                 | 0.70                                             | urease beta subunit                                                   |
| Cell wall biosynthesis  | GraRS  | SACOL2282 | ureABCDFG               | ureC        | 1.89                       | 0.49                  | -2.05                | -0.56            | 3.67            | 1.48                  | 0.27                 | 0.71                                             | urease alpha subunit                                                  |
| Cell wall biosynthesis  | GraRS  | SACOL2283 | ureABCDFG               | ureE        | 1.70                       | 0.36                  | -1.81                | -0.44            | 3.35            | 1.28                  | 0.29                 | 0.74                                             | urease accessory protein UreE                                         |
| Cell wall biosynthesis  | GraRS  | SACOL2284 | ureABCDFG               | ureF        | 1.72                       | 0.39                  | -1.75                | -0.42            | 3.30            | 1.31                  | 0.30                 | 0.75                                             | urease accessory protein UreF                                         |
| Cell wall biosynthesis  | GraRS  | SACOL2285 | ureABCDFG               | ureG        | 1.81                       | 0.38                  | -1.59                | -0.16            | 3.52            | 1.30                  | 0.63                 | 0.90                                             | urease accessory protein UreG                                         |
| Cell wall biosynthesis  | GraRS  | SACOL2286 | ureABCDFG               | ureD        | 1.63                       | 0.24                  | -1.84                | -0.21            | 3.09            | 1.08                  | 0.34                 | 0.68                                             | urease accessory protein UreD                                         |
| Cell wall biosynthesis  | GraRS  | SACOL0019 | waIRH                   | waIR        | 0.75                       | 0.24                  | -0.69                | -0.18            | 1.68            | 1.18                  | 0.62                 | 0.88                                             | response regulator VcR                                                |
| Cell wall biosynthesis  | GraRS  | SACOL0020 | waRH                    | waR         | 0.84                       | 0.20                  | -0.73                | -0.10            | 1.79            | 1.15                  | 0.60                 | 0.93                                             | sensor histidine kinase VcK                                           |
| Cell wall biosynthesis  | GraRS  | SACOL0021 | waRH                    | waR         | 0.92                       | 0.21                  | -0.97                | -0.14            | 1.90            | 1.13                  | 0.63                 | 0.94                                             | hypothetical protein VcH                                              |
| Cell wall biosynthesis  | GraRS  | SACOL0022 | waRH                    | waR         | 1.02                       | 0.22                  | -0.73                | -0.09            | 1.98            | 1.27                  | 0.60                 | 0.94                                             | hypothetical protein VcI                                              |
| Cell wall biosynthesis  | GraRS  | SACOL1440 | xpcA                    | xpcA        | 2.02                       | 0.62                  | -1.29                | -0.20            | 4.06            | 1.54                  | 0.33                 | 0.87                                             | 5-bromo-4-chlorouridine phosphate hydrolase                           |
| Cell wall biosynthesis  | GraRS  | SACOL1441 | xpcA                    | xpcA        | 1.95                       | 0.58                  | -1.36                | -0.11            | 3.94            | 1.51                  | 0.33                 | 0.87                                             | 5-bromo-4-chlorouridine phosphate hydrolase                           |
| Cell wall biosynthesis  | GraRS  | SACOL2367 | yHfP                    | yHfP        | 1.74                       | 1.04                  | -1.26                | -0.57            | 3.34            | 2.06                  | 0.42                 | 0.67                                             | zinc-binding alcohol dehydrogenase                                    |
| Cell wall biosynthesis  | GraRS  | SACOL0977 | yWV                     | yWV         | 2.31                       | 1.35                  | -1.10                | -0.15            | 4.95            | 2.55                  | 0.47                 | 0.90                                             | hypothetical protein                                                  |
| Cell wall biosynthesis  | GraRS  | SACOL1006 | yWV                     | yWV         | 1.09                       | 0.16                  | -1.58                | -0.33            | 2.13            | 1.88                  | 0.91                 | 1.02                                             | hypothetical protein                                                  |
| Cell wall biosynthesis  | GraRS  | SACOL1007 | yWV                     | yWV         | 0.76                       | 0.35                  | -1.65                | -0.55            | 1.70            | 0.78                  | 0.32                 | 0.68                                             | globin family protein                                                 |
| Cell wall biosynthesis  | GraRS  | SACOL0656 | yWV                     | yWV         | 0.99                       | -0.20                 | -1.07                | -0.10            | 1.99            | 0.87                  | 0.46                 | 1.07                                             | putative flavodoxin                                                   |
| Cell wall biosynthesis  | GraRS  | SACOL0657 | yWV                     | yWV         | 1.54                       | 0.34                  | -1.80                | -0.26            | 3.16            | 0.76                  | 0.42                 | 1.01                                             | glucose-6-phosphate 1-dehydrogenase                                   |
| DNA damage              | LnaA   | SACOL1600 | dnaB2                   | dnaB2       | 2.50                       | 1.10                  | -1.22                | -0.15            | 5.64            | 2.85                  | 0.61                 | 0.88                                             | ImpB/Sam3/Sam8 family DNA-damage repair protein                       |
| DNA damage              | LnaA   | SACOL0789 | zurF SACOL0790          | zurF        | -1.18                      | -0.36                 | 0.93                 | 0.10             | 0.44            | 0.78                  | 1.93                 | 1.59                                             | 7-Cyano-7-deazaadenine reductase                                      |
| DNA damage              | LnaA   | SACOL0790 | zurF SACOL0790          | zurF        | -1.02                      | -0.46                 | 0.61                 | 0.17             | 0.40            | 0.73                  | 1.15                 | intracellular membrane domain-containing protein |                                                                       |
| DNA damage              | LnaA   | SACOL1304 | recA                    | recA        | 1.40                       | 0.91                  | -0.66                | -0.16            | 2.65            | 1.88                  | 0.63                 | 0.90                                             | recombinase A                                                         |
| DNA damage              | LnaA   | SACOL0823 | uvrB uvrA               | uvrB        | 0.97                       | 0.06                  | -0.94                | -0.04            | 1.96            | 1.04                  | 0.52                 | 0.97                                             | excinuclease ABC subunit B                                            |
| DNA damage              | LnaA   | SACOL0824 | uvrB uvrA               | uvrA        | 1.73                       | 0.51                  | -1.06                | -0.48            | 3.25            | 1.62                  | 0.43                 | 0.92                                             | excinuclease ABC subunit A                                            |
| Energy metabolism       | CagR   | SACOL0837 | znpR znpR TPA ppm eno   | znpR        | 0.74                       | 0.10                  | -0.47                | -1.11            | 1.67            | 1.07                  | 1.39                 | 2.16                                             | Deok family transcriptional regulator                                 |
| Energy metabolism       | CagR   | SACOL0838 | znpR znpR TPA ppm eno   | znpR        | 1.10                       | -0.11                 | -0.44                | -1.66            | 2.15            | 0.93                  | 1.36                 | 3.16                                             | glyceraldehyde-3-phosphate dehydrogenase (phosphorylating)            |
| Energy metabolism       | CagR   | SACOL0839 | znpR znpR TPA ppm eno   | znpR        | 1.48                       | 0.04                  | -0.17                | -1.57            | 2.71            | 1.03                  | 1.13                 | 2.97                                             | phosphoglycerate kinase                                               |
| Energy metabolism       | CagR   | SACOL0840 | znpR znpR TPA ppm eno   | znpR        | 1.41                       | 0.03                  | -0.65                | -1.49            | 2.68            | 1.08                  | 1.09                 | 1.71                                             | triose-phosphate isomerase                                            |
| Energy metabolism       | CagR   | SACOL0841 | znpR znpR TPA ppm eno   | znpR        | 1.41                       | 0.04                  | -0.57                | -1.47            | 2.66            | 0.97                  | 1.04                 | 2.77                                             | bisphosphoglycerate mutase                                            |
| Energy metabolism       | CagR   | SACOL0842 | znpR znpR TPA ppm eno   | eno         | 1.24                       | -0.05                 | -0.13                | -1.07            | 2.47            | 1.68                  | 0.91                 | 2.10                                             | phosphoenolpyruvate hydratase                                         |
| Energy metabolism       | PDH    | SACOL1103 | pdhA pdhB pdhC pdhD     | pdhA        | 0.44                       | 0.08                  | -0.43                | -0.06            | 1.36            | 0.96                  | 0.74                 | 0.96                                             | pyruvate dehydrogenase (acetyltransfering) alpha subunit              |
| Energy metabolism       | PDH    | SACOL1103 | pdhA pdhB pdhC pdhD     | pdhB        | 0.53                       | -0.04                 | -0.53                | 0.03             | 1.44            | 0.97                  | 0.69                 | 1.02                                             | pyruvate dehydrogenase (acetyltransfering) beta subunit               |
| Energy metabolism       | PDH    | SACOL1104 | pdhA pdhB pdhC pdhD     | pdhC        | 0.60                       | 0.00                  | -0.50                | -0.09            | 1.52            | 1.00                  | 0.71                 | 1.08                                             | hydroxylysine-residue acetyltransferase                               |
| Energy metabolism       | PDH    | SACOL1105 | pdhA pdhB pdhC pdhD     | pdhD        | 0.43                       | 0.31                  | -0.38                | 0.17             | 1.13            | 0.97                  | 0.71                 | 1.13                                             | hydroxylysine-lysine acetyltransferase                                |
| Fatty acid biosynthesis | FapR   | SACOL0987 | fapH                    | fapH        | 1.31                       | 0.73                  | -1.33                | -0.77            | 2.48            | 1.66                  | 0.40                 | 0.59                                             | 3-oxoacyl-[acyl-carrier-protein] synthase                             |
| Fatty acid biosynthesis | FapR   | SACOL0988 | fapH                    | fapH        | 1.40                       | 0.65                  | -1.41                | -0.67            | 2.65            | 1.57                  | 0.38                 | 0.63                                             | 3-oxoacyl-[acyl-carrier-protein] synthase (NADH)                      |
| Fatty acid biosynthesis | FapR   | SACOL1242 |                         |             |                            |                       |                      |                  |                 |                       |                      |                                                  |                                                                       |



| GeneSet               | Regulon | Locus     | Organ                              | Gene symbol | log <sub>2</sub> -fold change (M-value) |                       |                       |                  | Fold changes    |                       |                       |                  | Function                                                              |
|-----------------------|---------|-----------|------------------------------------|-------------|-----------------------------------------|-----------------------|-----------------------|------------------|-----------------|-----------------------|-----------------------|------------------|-----------------------------------------------------------------------|
|                       |         |           |                                    |             | WT MMEQ / WT co                         | ΔmtrA MMEQ / ΔmtrA co | ΔmtrG MMEQ / ΔmtrG co | ΔmtrH co / WT co | WT MMEQ / WT co | ΔmtrA MMEQ / ΔmtrA co | ΔmtrG MMEQ / ΔmtrG co | ΔmtrH co / WT co |                                                                       |
| Stress and Starvation | StgB    | SACOL0921 | SACOL0921 fabK                     | SACOL0921   | 1.68                                    | 1.17                  | -0.34                 | 0.13             | 3.19            | 2.25                  | 0.79                  | 1.09             | CBS domain protein                                                    |
| Stress and Starvation | StgB    | SACOL0922 | SACOL0922 fabK                     | SACOL0922   | 1.51                                    | 1.51                  | -0.57                 | -0.18            | 3.75            | 2.85                  | 0.67                  | 0.88             | 2-nitropropane dioxygenase                                            |
| Stress and Starvation | StgB    | SACOL1046 | SACOL1046                          | SACOL1046   | 1.34                                    | 0.23                  | -0.96                 | 0.13             | 2.54            | 1.17                  | 0.51                  | 1.09             | Hypothetical protein                                                  |
| Stress and Starvation | StgB    | SACOL1788 | SACOL1788 SACOL1789                | SACOL1788   | 1.49                                    | 0.87                  | -0.22                 | 0.18             | 2.42            | 1.83                  | 0.96                  | 1.13             | Hypothetical protein                                                  |
| Stress and Starvation | StgB    | SACOL1789 | SACOL1788 SACOL1789                | SACOL1789   | 0.99                                    | 0.78                  | -0.28                 | -0.07            | 1.99            | 1.72                  | 0.82                  | 0.95             | possible general stress protein                                       |
| Stress and Starvation | StgB    | SACOL1802 | SACOL1802 muA SACOL1804            | SACOL1802   | -0.38                                   | -0.31                 | 0.22                  | 0.14             | 0.77            | 0.81                  | 1.16                  | 1.10             | ribosomal small subunit pseudouridine synthase A                      |
| Stress and Starvation | StgB    | SACOL1803 | SACOL1802 muA SACOL1804            | muA         | 0.56                                    | 0.40                  | 0.20                  | 0.40             | 0.68            | 0.76                  | 1.23                  | 1.10             | ribosomal small subunit pseudouridine synthase A                      |
| Stress and Starvation | StgB    | SACOL1804 | SACOL1802 muA SACOL1804            | muA         | 0.73                                    | -0.47                 | 0.40                  | 0.13             | 0.60            | 0.72                  | 1.32                  | 1.09             | polysaccharide biosynthesis protein                                   |
| Stress and Starvation | StgB    | SACOL1911 | SACOL1911 SACOL1912                | SACOL1911   | 0.97                                    | 0.37                  | -0.48                 | 0.11             | 1.96            | 1.29                  | 0.72                  | 1.08             | Hypothetical protein                                                  |
| Stress and Starvation | StgB    | SACOL1912 | SACOL1911 SACOL1912                | SACOL1912   | 0.55                                    | 0.13                  | -0.22                 | 0.11             | 1.47            | 0.73                  | 1.22                  | 1.10             | glucosyltransferase                                                   |
| Stress and Starvation | StgB    | SACOL2012 | SACOL2012                          | SACOL2012   | 1.11                                    | 0.25                  | -0.72                 | 0.12             | 2.15            | 1.19                  | 0.61                  | 1.09             | GNAT family acetyltransferase                                         |
| Stress and Starvation | StgB    | SACOL2076 | SACOL2076 SACOL2077 csoR           | SACOL2076   | -1.46                                   | -1.08                 | 0.83                  | 0.43             | 0.36            | 0.47                  | 1.78                  | 1.35             | Hypothetical protein                                                  |
| Stress and Starvation | StgB    | SACOL2077 | SACOL2076 SACOL2077 csoR           | SACOL2077   | 0.73                                    | -0.66                 | 0.73                  | 0.66             | 0.64            | 0.66                  | 1.66                  | 1.58             | Hypothetical protein                                                  |
| Stress and Starvation | StgB    | SACOL2078 | SACOL2076 SACOL2077 csoR           | csoR        | 0.86                                    | 0.54                  | 0.55                  | 0.55             | 0.55            | 0.69                  | 1.89                  | 1.47             | Copper-sensing transcriptional repressor RcuR                         |
| Stress and Starvation | StgB    | SACOL2114 | SACOL2114                          | aldA        | 2.36                                    | 1.80                  | 0.41                  | 0.14             | 5.15            | 3.48                  | 0.75                  | 1.10             | aldehyde dehydrogenase                                                |
| Stress and Starvation | StgB    | SACOL2132 | SACOL2132                          | SACOL2132   | 2.29                                    | 0.98                  | -1.08                 | 0.12             | 4.61            | 1.97                  | 0.47                  | 1.09             | Hypothetical protein                                                  |
| Stress and Starvation | StgB    | SACOL2168 | SACOL2168 SACOL2169 SACOL2170      | SACOL2168   | 2.50                                    | 1.56                  | -0.27                 | 0.66             | 5.65            | 2.95                  | 0.83                  | 1.58             | Hypothetical protein                                                  |
| Stress and Starvation | StgB    | SACOL2169 | SACOL2168 SACOL2169 SACOL2170      | SACOL2169   | 1.75                                    | 1.01                  | -0.20                 | 0.53             | 3.37            | 2.01                  | 0.87                  | 1.44             | possible luciferase                                                   |
| Stress and Starvation | StgB    | SACOL2170 | SACOL2168 SACOL2169 SACOL2170      | SACOL2170   | 2.24                                    | 1.14                  | -0.60                 | 0.47             | 4.72            | 2.30                  | 0.66                  | 1.39             | MFS family major facilitator transporter                              |
| Stress and Starvation | StgB    | SACOL2519 | SACOL2519                          | SACOL2519   | 1.88                                    | 1.50                  | -1.06                 | -0.67            | 3.68            | 2.83                  | 0.48                  | 0.63             | Hypothetical protein                                                  |
| Stress and Starvation | StgB    | SACOL2621 | SACOL2621                          | SACOL2621   | -1.92                                   | -0.61                 | 2.02                  | 0.68             | 0.26            | 0.66                  | 0.66                  | 1.06             | Hypothetical membrane protein                                         |
| Stress and Starvation | StgB    | SACOL2717 | SACOL2717                          | SACOL2717   | 2.22                                    | -1.07                 | 0.97                  | 0.21             | 4.98            | 2.56                  | 0.48                  | 0.86             | possible metallo-beta-lactamase                                       |
| Stress and Starvation | StgB    | SACOL2717 | SACOL2717                          | SACOL2717   | -1.20                                   | -0.75                 | 0.71                  | 0.25             | 0.43            | 0.59                  | 1.64                  | 1.19             | Hypothetical protein                                                  |
| Stress and Starvation | StgB    | SACOL0672 | arpA                               | arpA        | 1.39                                    | 0.23                  | -1.14                 | -0.05            | 2.51            | 1.17                  | 0.45                  | 0.97             | staphylococcal accessory regulator A                                  |
| Stress and Starvation | StgB    | SACOL2054 | hfrB rnbW rnbU                     | hfrB        | -1.58                                   | -0.07                 | 0.53                  | 0.29             | 11.79           | 1.25                  | 0.61                  | 0.69             | hypothetical accessory regulator 5                                    |
| Stress and Starvation | StgB    | SACOL2054 | hfrB rnbW rnbU                     | hfrB        | -0.59                                   | 0.12                  | 0.75                  | 0.05             | 0.67            | 1.09                  | 1.68                  | 1.04             | DNA-directed RNA polymerase sigma subunit FliA                        |
| Stress and Starvation | StgB    | SACOL2055 | hfrB rnbW rnbU                     | rnbW        | 0.69                                    | 0.09                  | 0.62                  | 0.17             | 0.62            | 1.06                  | 1.54                  | 0.89             | anti-sigma B factor                                                   |
| Stress and Starvation | StgB    | SACOL2056 | hfrB rnbW rnbU                     | hfrB        | -0.71                                   | -0.05                 | 0.85                  | -0.18            | 0.61            | 0.97                  | 1.80                  | 1.13             | anti-sigma B factor antagonist                                        |
| Stress and Starvation | StgB    | SACOL2057 | hfrB rnbW rnbU                     | rnbU        | 0.05                                    | 0.57                  | 0.10                  | 0.00             | 2.69            | 1.07                  | 1.49                  | 1.01             | sigma factor B regulator                                              |
| Stress and Starvation | StgB    | SACOL0118 | hdhA1                              | hdhM        | 1.43                                    | 1.14                  | -0.59                 | -0.28            | 2.69            | 2.20                  | 0.66                  | 0.82             | superoxide dismutase                                                  |
| Stress and Starvation | StgB    | SACOL0118 | hdhA1                              | hdhM        | -1.11                                   | -1.50                 | 0.49                  | -0.39            | 0.49            | 0.45                  | 1.22                  | 1.56             | ironical monophosphatase family protein                               |
| Stress and Starvation | StgB    | SACOL2711 | yeaE                               | yeaE        | 6.64                                    | 6.50                  | -0.47                 | 1.66             | 100.06          | 22.43                 | 0.72                  | 1.16             | Hypothetical protein                                                  |
| Stress and Starvation | StgB    | SACOL2136 | vibE                               | vibE        | -0.79                                   | -0.20                 | 0.92                  | 0.31             | 0.58            | 0.87                  | 1.89                  | 1.24             | putative NAD dependent epimerase                                      |
| Stress and Starvation | StgB    | SACOL2300 | yrbD yhbA                          | yrbD        | -0.63                                   | 0.30                  | 0.73                  | -0.19            | 0.65            | 1.23                  | 1.66                  | 0.88             | Hypothetical protein                                                  |
| Stress and Starvation | StgB    | SACOL2302 | yrbD yhbA                          | yrbD        | 0.25                                    | 0.04                  | 0.28                  | 0.01             | 1.09            | 1.82                  | 1.67                  | 1.06             | formate dehydrogenase alpha subunit                                   |
| Sugar catabolism      | CcpA    | SACOL1048 | SACOL1048                          | SACOL1048   | 2.45                                    | 0.21                  | -2.50                 | -0.22            | 5.48            | 1.16                  | 0.18                  | 0.86             | acetyltransferase                                                     |
| Sugar catabolism      | CcpA    | SACOL1758 | alg2                               | alg2        | -1.58                                   | -1.47                 | 0.50                  | 0.37             | 0.33            | 0.36                  | 1.41                  | 1.29             | alanine dehydrogenase                                                 |
| Sugar catabolism      | CcpA    | SACOL1954 | capD                               | capD        | 3.56                                    | 1.32                  | -2.59                 | 0.33             | 2.79            | 1.25                  | 1.13                  | 1.15             | aldehyde dehydrogenase                                                |
| Sugar catabolism      | CcpA    | SACOL0599 | capD                               | capD        | -1.69                                   | -1.09                 | 0.54                  | 0.07             | 0.41            | 0.47                  | 1.45                  | 0.95             | NAD dependent epimerase/dehydratase family protein                    |
| Sugar catabolism      | CcpA    | SACOL1786 | capA                               | capA        | 2.82                                    | 1.94                  | -0.24                 | 0.24             | 7.05            | 1.52                  | 0.26                  | 1.18             | catabolite control protein A                                          |
| Sugar catabolism      | CcpA    | SACOL0707 | capM                               | capM        | 1.20                                    | 0.10                  | -0.52                 | 0.14             | 0.67            | 0.74                  | 1.07                  | 0.71             | phosphorylation kinase subunit DhaK                                   |
| Sugar catabolism      | CcpA    | SACOL0708 | dhxLM                              | dhxM        | 1.32                                    | 0.25                  | -0.42                 | 0.61             | 2.50            | 1.19                  | 0.75                  | 1.13             | DAK2 domain-containing protein DhaK                                   |
| Sugar catabolism      | CcpA    | SACOL0709 | dhxLM                              | dhxM        | 1.28                                    | 0.20                  | -0.39                 | 0.62             | 2.43            | 1.15                  | 0.76                  | 1.54             | PTS-dependent dihydroxyacetone kinase phosphotransferase subunit DhaM |
| Sugar catabolism      | CcpA    | SACOL0313 | fadEX                              | fadX        | 0.65                                    | -1.41                 | -0.22                 | 0.34             | 0.36            | 0.34                  | 1.27                  | 1.44             | acyl-CoA dehydrogenase                                                |
| Sugar catabolism      | CcpA    | SACOL0214 | fadDEX                             | fadEX       | -0.92                                   | -1.16                 | -0.44                 | -0.12            | 0.53            | 0.45                  | 0.74                  | 0.92             | long-chain fatty-acyl-CoA ligase                                      |
| Sugar catabolism      | CcpA    | SACOL0215 | fadDEX                             | fadX        | -2.20                                   | -1.74                 | -0.52                 | 0.91             | 0.22            | 0.30                  | 0.70                  | 0.53             | propionate CoA-transferase                                            |
| Sugar catabolism      | CcpA    | SACOL2319 | fadEX                              | fadX        | 0.65                                    | -0.42                 | 0.52                  | 0.27             | 0.52            | 0.56                  | 1.26                  | 1.03             | PTS system, IIIC component                                            |
| Sugar catabolism      | CcpA    | SACOL0173 | ipdC                               | ipdC        | 1.64                                    | 0.89                  | -0.78                 | 0.03             | 3.13            | 1.85                  | 0.58                  | 0.98             | thiamine pyrophosphate TPP binding domain-containing protein          |
| Sugar catabolism      | CcpA    | SACOL0960 | ipdC                               | ipdC        | 1.15                                    | -0.43                 | -1.26                 | 0.30             | 2.22            | 0.74                  | 0.42                  | 1.23             | ornithine-oxo acid transaminase                                       |
| Sugar catabolism      | CcpA    | SACOL0961 | ipdC                               | ipdC        | 0.21                                    | -0.05                 | 0.85                  | 0.29             | 1.16            | 0.57                  | 0.85                  | 1.22             | aldehyde dehydrogenase                                                |
| Sugar catabolism      | CcpA    | SACOL0376 | SACOL0376 murJ murP SACOL0179      | SACOL0376   | -1.90                                   | -1.37                 | 0.11                  | 0.15             | 0.39            | 0.27                  | 0.39                  | 1.11             | hyphoprotein                                                          |
| Sugar catabolism      | CcpA    | SACOL0177 | SACOL0176 murJ murP SACOL0179      | murJ        | -1.35                                   | -1.53                 | 0.11                  | 0.25             | 0.39            | 0.35                  | 1.08                  | 1.19             | N-acetylmuramic acid-6-phosphate esterase                             |
| Sugar catabolism      | CcpA    | SACOL0178 | SACOL0176 murJ murP SACOL0179      | murP        | 0.29                                    | 0.10                  | -0.77                 | 0.79             | 0.78            | 0.79                  | 1.74                  | 0.97             | N-acetylmuramic acid phosphotransferase                               |
| Sugar catabolism      | CcpA    | SACOL0179 | SACOL0176 murJ murP SACOL0179      | SACOL0179   | -0.90                                   | -1.03                 | 0.81                  | 0.85             | 0.54            | 0.49                  | 1.75                  | 1.80             | RifR family phosphotransferase-binding transcriptional regulator      |
| Sugar catabolism      | CcpA    | SACOL0938 | SACOL0938 ppsG nucP                | SACOL0938   | 0.59                                    | 0.06                  | -0.45                 | 0.04             | 1.51            | 1.04                  | 0.73                  | 1.03             | carbohydrate kinase                                                   |
| Sugar catabolism      | CcpA    | SACOL0939 | SACOL0938 ppsG nucP                | ppsG        | 0.52                                    | -0.26                 | -0.85                 | -0.22            | 1.25            | 0.84                  | 0.55                  | 0.86             | Hypothetical protein                                                  |
| Sugar catabolism      | CcpA    | SACOL0940 | SACOL0938 ppsG nucP                | nucP        | 1.07                                    | 0.80                  | -0.37                 | 0.60             | 0.90            | 0.90                  | 1.28                  | 1.02             | glucosyltransferase                                                   |
| Sugar catabolism      | CcpA    | SACOL1158 | sdhC sdhA sdhB                     | sdhC        | -0.65                                   | -0.38                 | 0.64                  | 0.38             | 0.64            | 0.77                  | 1.56                  | 1.27             | succinate dehydrogenase, cytochrome b558 subunit                      |
| Sugar catabolism      | CcpA    | SACOL1159 | sdhC sdhA sdhB                     | sdhA        | -0.90                                   | -0.58                 | 0.86                  | 0.51             | 0.54            | 0.67                  | 1.82                  | 1.42             | succinate dehydrogenase flavoprotein subunit                          |
| Sugar catabolism      | CcpA    | SACOL1160 | sdhC sdhA sdhB                     | sdhB        | 0.65                                    | 0.69                  | 1.05                  | 0.91             | 0.95            | 1.07                  | 1.71                  | 1.64             | succinate dehydrogenase iron-sulfur subunit                           |
| Translocation         | TrpA    | SACOL0590 | rplI3 rpsL rpsE fuaX tuf           | rplI3       | 0.87                                    | -0.11                 | 0.51                  | 0.51             | 0.51            | 0.61                  | 1.16                  | 0.69             | possible RNA-binding ribosomal protein                                |
| Translocation         | TrpA    | SACOL0591 | rplI3 rpsL rpsE fuaX tuf           | rpsL        | -0.89                                   | -1.09                 | 0.60                  | -0.09            | 0.54            | 0.88                  | 1.52                  | 0.94             | ribosomal protein S12                                                 |
| Translocation         | TrpA    | SACOL0592 | rplI3 rpsL rpsE fuaX tuf           | rpsE        | 0.86                                    | -0.61                 | 0.35                  | 0.89             | 0.59            | 0.71                  | 1.02                  | 1.06             | ribosomal protein S16                                                 |
| Translocation         | TrpA    | SACOL0594 | rplI3 rpsL rpsE fuaX tuf           | tuf         | 0.27                                    | -0.03                 | 0.35                  | 0.11             | 0.83            | 0.98                  | 1.27                  | 1.08             | elongation factor EF1A                                                |
| Transport             | TrpB    | SACOL2376 | zrfA                               | zrfA        | -1.54                                   | -1.09                 | 1.36                  | 0.89             | 0.34            | 0.47                  | 2.57                  | 1.85             | PTS family sucrose/isomer/transporter IIBC                            |
| Transport             | TrpB    | SACOL2368 | zrfA                               | zrfA        | 0.46                                    | 0.56                  | 0.67                  | 0.67             | 1.48            | 1.48                  | 1.48                  | 1.48             | PTS family cell wall surface anchor protein                           |
| Transport             | TrpA    | SACOL0608 | zrfA                               | zrfA        | -2.50                                   | -1.20                 | -0.15                 | 1.18             | 1.08            | 0.44                  | 1.11                  | 0.47             | Ser-Asp rich fibronectin/bone sialoprotein-binding protein SdcC       |
| Transport             | TrpA    | SACOL2023 | zrfA                               | zrfA        | -1.53                                   | -0.58                 | -0.27                 | -1.15            | 0.35            | 0.67                  | 0.83                  | 0.45             | accessory gene regulator protein B                                    |
| Transport             | TrpA    | SACOL2024 | zrfA                               | zrfA        | 1.29                                    | 0.25                  | -0.42                 | 0.13             | 0.67            | 0.67                  | 1.16                  | 0.71             | accessory gene regulator protein D                                    |
| Transport             | TrpA    | SACOL2025 | zrfA                               | zrfA        | -0.47                                   | 0.07                  | -0.17                 | 0.70             | 0.72            | 1.05                  | 0.89                  | 0.62             | accessory gene regulator protein C                                    |
| Transport             | TrpA    | SACOL2026 | zrfA                               | zrfA        | -0.08                                   | 0.22                  | -0.13                 | 0.42             | 0.94            | 1.16                  | 0.91                  | 0.75             | accessory gene regulator protein A                                    |
| Transport             | TrpA    | SACOL0162 | zrfA                               | zrfA        | -1.71                                   | -1.18                 | 1.50                  | 0.22             | 0.63            | 0.88                  | 1.81                  | 0.89             | clumping factor B                                                     |
| Transport             | TrpA    | SACOL0162 | zrfA                               | zrfA        | 1.41                                    | 0.63                  | -0.22                 | 0.53             | 2.66            | 1.55                  | 0.86                  | 1.44             | formate dehydrogenase                                                 |
| Transport             | TrpA    | SACOL0317 | zrfA                               | zrfA        | -1.90                                   | -0.53                 | -0.17                 | 1.48             | 0.27            | 0.69                  | 0.89                  | 0.36             | tricarboxylate lyase                                                  |
| Transport             | TrpA    | SACOL2366 | zrfA                               | zrfA        | 0.83                                    | -0.30                 | -0.55                 | 0.26             | 1.26            | 0.65                  | 0.52                  | 0.42             | ESS family glutamate/sodium (Na+) symporter                           |
| Transport             | TrpA    | SACOL2364 | zrfA                               | zrfA        | -0.90                                   | -0.81                 | -0.18                 | -0.26            | 0.54            | 0.57                  | 0.88                  | 0.84             | hyaluronate lyase                                                     |
| Transport             | TrpA    | SACOL2688 | zrfA                               | zrfA        | 1.24                                    | 0.25                  | -1.86                 | 0.86             | 2.36            | 1.19                  | 0.28                  | 0.55             | ico operon transcriptional regulator I                                |
| Transport             | TrpA    | SACOL0487 | zrfA SACOL0487 SACOL0488 SACOL0489 | zrfA        | 0.67                                    | -0.62                 | -0.52                 | 0.67             | 0.65            | 0.67                  | 0.65                  | 0.72             | immunosuppressive lipoprotein                                         |
| Transport             | TrpA    | SACOL0487 | zrfA SACOL0487 SACOL0488 SACOL0489 | SACOL0487   | -0.30                                   | -0.53                 | -0.52                 | -0.28            | 0.81            | 0.69                  | 0.70                  | 0.82             | Hypothetical protein                                                  |
| Transport             | TrpA    | SACOL0488 | zrfA SACOL0487 SACOL0488 SACOL0489 | SACOL0488   | -0.23                                   | -0.11                 | -0.38                 | -0.29            | 0.85            | 0.81                  | 0.77                  | 0.62             | Hypothetical protein                                                  |
| Transport             | TrpA    | SACOL0489 | zrfA SACOL0487 SACOL0488 SACOL0489 | SACOL0489   | -0.28                                   | -0.10                 | -0.43                 | -0.49            | 0.88            | 0.79                  | 0.88                  | 0.71             | Hypothetical protein                                                  |
| Transport             | TrpA    | SACOL2389 | zrfA                               | zrfA        | -4.94                                   | -2.40                 | 0.58                  | 0.67             | 0.03            | 0.19                  | 1.49                  | 0.19             | transcriptional regulator NtrR                                        |
| Transport             | TrpA    | SACOL0078 | zrfA                               | zrfA        | 0.90                                    | 0.33                  | 0.74                  | 0.42             | 0.54            | 1.26                  | 1.67                  | 0.75             | phosphatidylinositol diacylglycerol lyase                             |
| Transport             | TrpA    | SACOL0253 | zrfA                               | zrfA        | -1.04                                   | -0.45                 | 0.63                  | 0.02             | 0.49            | 0.73                  | 1.55                  | 1.05             | Fibronectin                                                           |
| Transport             | TrpA    | SACOL0254 | zrfA                               | zrfA        | 1.24                                    | 0.47                  | 0.65                  | 0.40             | 0.92            | 1.42                  | 1.46                  | 1.07             | ribonucleoside triphosphate: membrane protein                         |
| Transport             | TrpA    | SACOL0255 | zrfA                               | zrfA        | -1.50                                   | -0.62                 | 0.45                  | 0.43             | 0.35            | 0.65                  | 1.37                  | 1.04             | DMT superfamily drug/metabolite transporter                           |
| Transport             | TrpA    | SACOL0462 | zrfA                               | zrfA        | 2.26                                    | 1.12                  | -0.65                 | 0.43             | 4.90            | 2.17                  | 0.66                  | 3.25             | possible bacteriophage integrase                                      |
| Transport             | TrpA    | SACOL0678 | zrfA                               | zrfA        | 2.89                                    | 2.89                  | 0.09                  | 0.12             | 0.99            | 0.91                  | 0.82                  | 1.00             | possible bacteriophage integrase                                      |
| Transport             | TrpA    | SACOL0679 | zrfA                               | zrfA        | 1.48                                    | 1.1                   |                       |                  |                 |                       |                       |                  |                                                                       |

| GeneSet  | Regulon | Gene      | Organ     | Gene symbol | log <sub>2</sub> -fold change (M-value) |                     |                   |                 | Fold changes  |                     |                   |                 | Function                                                              |
|----------|---------|-----------|-----------|-------------|-----------------------------------------|---------------------|-------------------|-----------------|---------------|---------------------|-------------------|-----------------|-----------------------------------------------------------------------|
|          |         |           |           |             | WT MMR/ WT co                           | ΔmmhQ MMR/ ΔmmhQ co | ΔmmhQ MMR/ WT MMR | ΔmmhQ co/ WT co | WT MMR/ WT co | ΔmmhQ MMR/ ΔmmhQ co | ΔmmhQ MMR/ WT MMR | ΔmmhQ co/ WT co |                                                                       |
| Violence | Agfa    | SACOL2544 | sdAA      | sdAA        | 0.84                                    | -0.61               | -0.47             | 0.94            | 1.79          | 0.66                | 0.72              | 1.92            | L-serine dehydratase, iron-sulfur-dependent subunit alpha             |
| Violence | Agfa    | SACOL2545 | sdAA      | sdAA        | 0.70                                    | -0.61               | -0.31             | 0.95            | 1.62          | 0.64                | 0.81              | 1.93            | L-serine dehydratase, iron-sulfur-dependent subunit beta              |
| Violence | Agfa    | SACOL2546 | sdAA      | sdAA        | 0.66                                    | -0.72               | -0.33             | 0.98            | 1.58          | 0.61                | 0.80              | 1.97            | hypothetical protein                                                  |
| Violence | Agfa    | SACOL1864 | spfl      | spfl        | 2.47                                    | 0.97                | 0.86              | 0.97            | 0.85          | 1.93                | 0.91              | 1.80            | serine protease Spfl                                                  |
| Violence | Agfa    | SACOL1865 | spfl      | spfl        | 1.87                                    | 1.21                | 0.43              | 0.87            | 1.67          | 2.31                | 0.74              | 1.05            | serine protease Spfl                                                  |
| Violence | Agfa    | SACOL1866 | spfl      | spfl        | 2.45                                    | 0.23                | -0.45             | 1.04            | 5.48          | 1.17                | 0.73              | 2.06            | serine protease Spfl                                                  |
| Violence | Agfa    | SACOL1867 | spfl      | spfl        | 1.79                                    | 0.76                | 0.51              | 0.91            | 3.41          | 1.37                | 1.46              | 1.33            | serine protease Spfl                                                  |
| Violence | Agfa    | SACOL1868 | spfl      | spfl        | 1.32                                    | 0.76                | 0.04              | 0.81            | 2.49          | 1.69                | 0.97              | 1.24            | serine protease Spfl                                                  |
| Violence | Agfa    | SACOL1869 | spfl      | spfl        | 0.94                                    | 0.64                | -0.34             | 0.66            | 1.92          | 1.56                | 0.79              | 0.96            | serine protease Spfl                                                  |
| Violence | Agfa    | SACOL1448 | tucA      | tucA        | 0.79                                    | -1.36               | -0.31             | 0.54            | 0.66          | 0.75                | 0.91              | 1.45            | glyoxylate decarboxylase                                              |
| Violence | Agfa    | SACOL1449 | tucA      | tucA        | -0.81                                   | -1.50               | -0.45             | 0.21            | 0.57          | 0.35                | 0.73              | 1.16            | 2-oxoglutarate dehydrogenase II component                             |
| Violence | Agfa    | SACOL0626 | tdhD1     | tdhD1       | 2.10                                    | 0.74                | -1.43             | -0.09           | 4.30          | 1.67                | 0.37              | 0.94            | phosphomethylpyrimidine kinase                                        |
| Violence | Agfa    | SACOL1676 | trmU      | trmU        | 2.09                                    | 0.81                | 1.01              | 0.26            | 0.56          | 1.75                | 0.50              | 1.20            | RNA-specific 2-thiouridine kinase                                     |
| Violence | Agfa    | SACOL1677 | trmU      | trmU        | 1.90                                    | 0.79                | -1.01             | 0.08            | 3.72          | 1.73                | 0.50              | 1.06            | class V aminotransferase                                              |
| Violence | Agfa    | SACOL0003 | yaac      | yaac        | 1.31                                    | 0.87                | -0.23             | 0.19            | 2.48          | 1.83                | 0.85              | 1.14            | hypothetical protein                                                  |
| Violence | Agfa    | SACOL0004 | yaac      | yaac        | 0.95                                    | 0.66                | -0.20             | 0.02            | 1.93          | 1.58                | 0.81              | 1.09            | recombination protein F                                               |
| Violence | Agfa    | SACOL0005 | yaac      | yaac        | 0.69                                    | 0.33                | -0.11             | 0.24            | 1.62          | 1.26                | 0.93              | 1.18            | DNA gyrase, B subunit                                                 |
| Violence | Agfa    | SACOL0006 | yaac      | yaac        | 0.92                                    | 0.30                | -0.18             | 0.08            | 1.48          | 1.23                | 0.88              | 1.06            | DNA gyrase, A subunit                                                 |
| Violence | Agfa    | SACOL0115 | capB      | capB        | -1.58                                   | -1.16               | -0.46             | -0.89           | 0.33          | 1.12                | 1.38              | 0.54            | glycosyltransferase                                                   |
| Violence | Agfa    | SACOL0116 | capB      | capB        | -0.81                                   | -0.07               | 0.73              | -0.12           | 0.57          | 1.05                | 1.66              | 0.92            | hypothetical protein                                                  |
| Violence | Agfa    | SACOL0117 | capB      | capB        | -1.47                                   | -0.63               | -0.84             | -0.22           | 0.57          | 1.03                | 1.07              | 0.57            | polysaccharide biosynthesis protein                                   |
| Violence | Agfa    | SACOL0856 | dtd       | dtd         | 1.90                                    | 0.48                | 0.51              | 0.87            | 3.74          | 1.39                | 0.70              | 1.83            | Fibronectin-binding protein                                           |
| Violence | Agfa    | SACOL2355 | ddh       | ddh         | 1.62                                    | 0.60                | 0.80              | 0.19            | 3.08          | 1.52                | 0.57              | 1.14            | D-lactate dehydrogenase                                               |
| Violence | Agfa    | SACOL0858 | pbpT      | pbpT        | -1.15                                   | -0.24               | -0.22             | 0.66            | 0.45          | 0.85                | 1.16              | 0.63            | secretory extracellular matrix and plasma binding protein             |
| Violence | Agfa    | SACOL2620 | pbpT      | pbpT        | -1.15                                   | -0.24               | -0.22             | 0.66            | 0.45          | 0.85                | 1.16              | 0.63            | 4-aminobutyrate transaminase                                          |
| Violence | Agfa    | SACOL0113 | pafl      | pafl        | -2.52                                   | -1.09               | -1.12             | -1.14           | 0.17          | 0.47                | 1.09              | 0.45            | UDP-glucose 4-epimerase                                               |
| Violence | Agfa    | SACOL0114 | pafl      | pafl        | -1.39                                   | -0.97               | -0.79             | -0.81           | 0.38          | 0.51                | 0.88              | 0.57            | capsular polysaccharide biosynthesis protein                          |
| Violence | Agfa    | SACOL1349 | prf1      | prf1        | 1.03                                    | 0.84                | 0.13              | 0.01            | 0.51          | 0.41                | 0.51              | 0.41            | aromatic amino acid beta-eliminating lysyl/threonine aldolase         |
| Violence | Agfa    | SACOL0526 | hoIB      | hoIB        | 0.83                                    | 0.68                | -0.09             | 0.09            | 1.78          | 1.60                | 0.97              | 1.00            | DNA-directed DNA polymerase III delta' subunit                        |
| Violence | Agfa    | SACOL0527 | hoIB      | hoIB        | 0.83                                    | 0.68                | -0.09             | 0.09            | 1.78          | 1.60                | 0.97              | 1.00            | hypothetical protein                                                  |
| Violence | Agfa    | SACOL0528 | hoIB      | hoIB        | 0.83                                    | 0.68                | -0.09             | 0.09            | 1.78          | 1.60                | 0.97              | 1.00            | DNA replication initiation control protein YabA                       |
| Violence | Agfa    | SACOL1777 | htrA1     | htrA1       | 1.00                                    | 0.49                | -1.18             | 0.66            | 2.00          | 1.40                | 0.44              | 0.63            | Trypsin-like serine endoprotease                                      |
| Violence | Agfa    | SACOL2680 | htrB      | htrB        | 1.09                                    | -0.49               | -1.74             | -0.20           | 2.13          | 0.71                | 0.30              | 0.87            | immunoglobulin antiporter                                             |
| Violence | Agfa    | SACOL0864 | htrB      | htrB        | 0.97                                    | 0.07                | -0.92             | 0.07            | 1.92          | 1.59                | 0.92              | 1.35            | peptidylarginine hydrolase related protein                            |
| Violence | Agfa    | SACOL1051 | menF      | menF        | 0.34                                    | -0.24               | -0.40             | 0.17            | 1.27          | 0.85                | 0.76              | 1.13            | isochorismate synthase                                                |
| Violence | Agfa    | SACOL1052 | menF      | menF        | 0.35                                    | -0.08               | -0.01             | 0.41            | 1.28          | 0.95                | 0.99              | 1.33            | 2-oxoglutarate decarboxylase                                          |
| Violence | Agfa    | SACOL1053 | menF      | menF        | 0.29                                    | -0.10               | -0.41             | 0.00            | 1.48          | 1.16                | 0.88              | 1.15            | S33 family peptidase                                                  |
| Violence | Agfa    | SACOL1054 | menF      | menF        | 1.34                                    | 0.61                | -0.47             | 0.24            | 2.52          | 1.53                | 0.72              | 1.18            | naphthate synthase                                                    |
| Violence | Agfa    | SACOL0428 | metE      | metE        | -0.67                                   | 0.15                | -0.17             | -0.95           | 0.63          | 1.11                | 0.89              | 0.52            | 5-methyltetrahydropteroylglutamate - homocysteine S-methyltransferase |
| Violence | Agfa    | SACOL0429 | metE      | metE        | -0.74                                   | 0.26                | -0.96             | -0.40           | 0.66          | 1.06                | 0.68              | 0.51            | methylenetetrahydrofolate reductase/Phenocysteine S-methyltransferase |
| Violence | Agfa    | SACOL0430 | metE      | metE        | -1.70                                   | -0.23               | -0.40             | -0.91           | 0.31          | 0.85                | 1.32              | 0.53            | ubiquinol:cytochrome gamma-lyase/gamma-synthase                       |
| Violence | Agfa    | SACOL0431 | metE      | metE        | -2.05                                   | -1.15               | -0.51             | -0.31           | 0.24          | 0.45                | 1.42              | 0.81            | ubiquinol:cytochrome gamma-lyase/gamma-synthase                       |
| Violence | Agfa    | SACOL2261 | mobA      | mobA        | 1.37                                    | 0.45                | -1.08             | -0.59           | 0.14          | 0.25                | 1.38              | 0.81            | difunctional cytochrome gamma-lyase/gamma-synthase                    |
| Violence | Agfa    | SACOL2262 | mobA      | mobA        | 1.31                                    | 0.30                | -1.03             | -0.04           | 2.48          | 1.23                | 0.49              | 0.97            | molibdenum (MoCo) cofactor biosynthesis protein A                     |
| Violence | Agfa    | SACOL2263 | mobA      | mobA        | 1.13                                    | 0.21                | -1.01             | -0.10           | 2.19          | 1.16                | 0.50              | 0.93            | molibdenum (MoCo) cofactor biosynthesis protein A                     |
| Violence | Agfa    | SACOL2264 | mobA      | mobA        | 1.24                                    | 0.17                | -1.04             | -0.08           | 2.20          | 1.15                | 0.50              | 0.93            | molibdenum (MoCo) cofactor biosynthesis protein A                     |
| Violence | Agfa    | SACOL2265 | mobA      | mobA        | 1.26                                    | 0.21                | -0.96             | -0.15           | 1.77          | 1.01                | 0.51              | 0.90            | molibdenum (MoCo) cofactor biosynthesis protein B                     |
| Violence | Agfa    | SACOL2266 | mobA      | mobA        | 1.41                                    | -0.07               | -0.68             | -0.22           | 1.52          | 0.95                | 0.62              | 0.99            | molibdenum (MoCo) cofactor biosynthesis protein B                     |
| Violence | Agfa    | SACOL1196 | murD      | murD        | -1.48                                   | -0.26               | -0.84             | -0.25           | 1.38          | 1.02                | 0.64              | 0.85            | phospho-N-acetylmuramoyl-pentapeptide transferase                     |
| Violence | Agfa    | SACOL1197 | murD      | murD        | -0.99                                   | -0.51               | -0.52             | -0.04           | 0.50          | 0.70                | 1.43              | 1.03            | UDP-N-acetylmuramoyl-D-glutamate lyase                                |
| Violence | Agfa    | SACOL0791 | dwib      | dwib        | 0.77                                    | -0.51               | -0.20             | 0.05            | 0.59          | 0.70                | 1.15              | 0.97            | cell division protein PsaQ                                            |
| Violence | Agfa    | SACOL2659 | pbpB      | pbpB        | 1.13                                    | 0.01                | -1.10             | 0.00            | 2.18          | 1.01                | 0.47              | 1.00            | M56 family major facilitator transporter                              |
| Violence | Agfa    | SACOL2109 | hemK      | hemK        | -1.79                                   | -0.80               | -1.16             | -0.16           | 0.29          | 0.57                | 2.23              | 1.12            | HemK family methyltransferase                                         |
| Violence | Agfa    | SACOL2110 | hemK      | hemK        | -1.87                                   | -0.81               | -1.23             | -0.31           | 0.25          | 0.55                | 0.49              | 0.91            | peptide chain release factor RF3                                      |
| Violence | Agfa    | SACOL2111 | hemK      | hemK        | -1.93                                   | -0.91               | -1.12             | -0.09           | 0.26          | 0.53                | 2.17              | 1.06            | thymidine kinase                                                      |
| Violence | Agfa    | SACOL2119 | pyrG      | pyrG        | -1.82                                   | -0.94               | -1.17             | 0.29            | 0.28          | 0.52                | 2.25              | 1.22            | CTP synthase                                                          |
| Violence | Agfa    | SACOL0217 | SACOL0217 | SACOL0217   | 1.14                                    | 0.13                | -0.82             | 0.26            | 2.36          | 1.09                | 0.57              | 1.20            | ABC transporter, binding protein                                      |
| Violence | Agfa    | SACOL0529 | SACOL0529 | SACOL0529   | 0.90                                    | 0.82                | 0.08              | 0.80            | 0.71          | 1.06                | 1.77              | 1.07            | hypothetical protein                                                  |
| Violence | Agfa    | SACOL0530 | SACOL0530 | SACOL0530   | 0.60                                    | 0.09                | 1.05              | 0.35            | 0.66          | 1.06                | 2.07              | 1.27            | hypothetical protein                                                  |
| Violence | Agfa    | SACOL0531 | SACOL0531 | SACOL0531   | -0.62                                   | 0.04                | 1.02              | 0.36            | 0.65          | 1.03                | 2.03              | 1.28            | tetraylamine methylase                                                |
| Violence | Agfa    | SACOL0664 | SACOL0664 | SACOL0664   | 0.94                                    | 0.40                | 0.51              | 0.31            | 0.71          | 0.64                | 1.01              | 1.01            | diquarylate cyclase GGDEF domain protein                              |
| Violence | Agfa    | SACOL0809 | SACOL0809 | SACOL0809   | -1.63                                   | -1.35               | -0.29             | -0.01           | 0.32          | 0.39                | 1.22              | 1.01            | diquarylate cyclase GGDEF domain protein                              |
| Violence | Agfa    | SACOL0871 | SACOL0871 | SACOL0871   | -1.02                                   | -0.38               | -0.01             | -0.89           | 0.49          | 0.95                | 0.99              | 0.54            | hypothetical protein                                                  |
| Violence | Agfa    | SACOL0991 | oppP      | oppP        | 1.28                                    | 0.20                | 0.90              | 0.41            | 1.68          | 0.91                | 0.81              | 0.81            | oligopeptide ABC transporter, membrane protein                        |
| Violence | Agfa    | SACOL0992 | oppP      | oppP        | -1.30                                   | -0.36               | 0.11              | -0.80           | 0.41          | 0.78                | 1.08              | 0.57            | oligopeptide ABC transporter, membrane protein                        |
| Violence | Agfa    | SACOL0993 | oppP      | oppP        | -0.69                                   | -0.21               | -0.07             | -0.53           | 0.62          | 0.86                | 0.95              | 0.69            | oligopeptide ABC transporter, ATP-binding protein                     |
| Violence | Agfa    | SACOL0994 | oppP      | oppP        | -0.25                                   | -0.17               | -0.02             | -0.18           | 0.67          | 0.70                | 1.17              | 0.61            | oligopeptide ABC transporter, ATP-binding protein                     |
| Violence | Agfa    | SACOL0995 | oppP      | oppP        | -0.38                                   | -0.04               | -0.02             | -0.34           | 0.77          | 0.97                | 0.99              | 0.79            | oligopeptide ABC transporter, binding protein                         |
| Violence | Agfa    | SACOL1009 | ppkK      | ppkK        | 0.34                                    | -0.62               | -0.82             | 0.12            | 1.27          | 0.65                | 0.57              | 1.09            | hypothetical protein                                                  |
| Violence | Agfa    | SACOL1010 | ppkK      | ppkK        | 0.21                                    | -0.17               | -0.14             | 0.22            | 1.34          | 1.27                | 1.16              | 1.16            | CTP diphosphokinase                                                   |
| Violence | Agfa    | SACOL1011 | ppkK      | ppkK        | 0.70                                    | -0.39               | -0.78             | 0.23            | 0.67          | 0.76                | 0.58              | 1.22            | inosinic polyphosphate/ATP-NAD kinase                                 |
| Violence | Agfa    | SACOL1012 | ppkK      | ppkK        | 0.90                                    | -0.04               | -0.67             | 0.26            | 1.87          | 0.97                | 0.63              | 1.20            | RubP subfamily ribosomal large subunit pseudouridine synthase         |
| Violence | Agfa    | SACOL1013 | ppkK      | ppkK        | 1.10                                    | 0.76                | -0.16             | -0.45           | 0.45          | 0.66                | 0.75              | 1.05            | MstE family magnesium (MgCo)-hydrolyase (HcpA) transporter            |
| Violence | Agfa    | SACOL1014 | ppkK      | ppkK        | 0.68                                    | 0.04                | -0.52             | 0.11            | 1.60          | 1.03                | 0.70              | 1.08            | CPA2 family monovalent cation porters (H+) antiporter-2               |
| Violence | Agfa    | SACOL1101 | SACOL1101 | SACOL1101   | 2.02                                    | 1.04                | -1.50             | -0.52           | 4.05          | 2.06                | 0.35              | 0.70            | hypothetical protein                                                  |
| Violence | Agfa    | SACOL1175 | SACOL1175 | SACOL1175   | 1.16                                    | 0.76                | -0.16             | -0.45           | 0.45          | 0.66                | 0.75              | 0.97            | hypothetical protein                                                  |
| Violence | Agfa    | SACOL1176 | SACOL1176 | SACOL1176   | -1.08                                   | -0.74               | -0.17             | -0.48           | 0.47          | 0.60                | 0.89              | 0.72            | hypothetical protein                                                  |
| Violence | Agfa    | SACOL1345 | SACOL1345 | SACOL1345   | -1.72                                   | -0.51               | -0.37             | -0.80           | 0.30          | 0.70                | 1.29              | 0.57            | hypothetical protein                                                  |
| Violence | Agfa    | SACOL1346 | SACOL1346 | SACOL1346   | -1.62                                   | -0.39               | -0.47             | -0.47           | 0.33          | 0.37                | 0.72              | 0.72            | hypothetical protein                                                  |
| Violence | Agfa    | SACOL1347 | SACOL1347 | SACOL1347   | -1.42                                   | -0.43               | -0.83             | -0.15           | 0.37          | 0.74                | 1.78              | 0.90            | hypothetical protein                                                  |
| Violence | Agfa    | SACOL1348 | SACOL1348 | SACOL1348   | -1.32                                   | -0.27               | -0.17             | -0.79           | 0.40          | 0.83                | 1.13              | 0.58            | hypothetical protein                                                  |
| Violence | Agfa    | SACOL1660 | SACOL1660 | SACOL1660   | 1.59                                    | 0.41                | 2.10              | 0.47            | 1.33          | 0.23                | 0.43              | 0.85            | hypothetical protein                                                  |
|          |         |           |           |             |                                         |                     |                   |                 |               |                     |                   |                 |                                                                       |
