# Supplementary material for: The MarR-Type Repressor MhqR Confers Quinone and Antimicrobial Resistance in Staphylococcus aureus
Source: PubMed Central journal article supplement (PMC6798810; doi:10.1089/ars.2019.7750), 2019-10-17
Supplement: Supp_Table3.pdf [file Supp_Table3.pdf]

**Table S3: Bacterial strains, phages and plasmids.**

| Strain                                              | Description                                                                                                                                                          | Reference     |
|-----------------------------------------------------|----------------------------------------------------------------------------------------------------------------------------------------------------------------------|---------------|
| <b><i>Escherichia coli</i></b>                      |                                                                                                                                                                      |               |
| BL21(DE3) <i>plysS</i>                              | F- <i>ompT hsdS gal</i> (rb-mb+)DE3( <i>Sam7 Δnin5 lacUV5-T7 Gen1</i> )                                                                                              | (1)           |
| BL21(DE3) <i>plysS</i> pET11b- <i>mhqR</i>          | overexpression of MhqR                                                                                                                                               | This study    |
| BL21(DE3) <i>plysS</i> pET11b- <i>mhqRC95A</i>      | overexpression of MhqRC95A                                                                                                                                           | This study    |
| <b><i>Staphylococcus aureus</i></b>                 |                                                                                                                                                                      |               |
| COL<br>RN4220                                       | archaic HA-MRSA strain<br>restriction negative strain/MSSA cloning intermediate<br>derived from 8325-4                                                               | (2, 3)<br>(4) |
| COL pRB473                                          | COL with empty plasmid                                                                                                                                               | (5)           |
| COL- $\Delta$ <i>mhqR</i>                           | COL <i>mhqR</i> deletion mutant                                                                                                                                      | This study    |
| COL- $\Delta$ <i>qsrR</i>                           | COL <i>qsrR</i> deletion mutant                                                                                                                                      | This study    |
| COL- $\Delta$ <i>mhqR</i> ::pRB473- <i>mhqR</i>     | COL <i>mhqR</i> complemented $\Delta$ <i>mhqR</i> mutant                                                                                                             | This study    |
| COL- $\Delta$ <i>mhqR</i> ::pRB473- <i>mhqRC95A</i> | COL <i>mhqRC95A</i> complemented $\Delta$ <i>mhqR</i> mutant                                                                                                         | This study    |
| COL-Brx-roGFP2                                      | COL pRB473- <i>brx-roGFP2</i>                                                                                                                                        | (5)           |
| COL- $\Delta$ <i>mhqR</i> Brx-roGFP2                | COL <i>mhqR</i> mutant pRB473- <i>brx-roGFP2</i>                                                                                                                     | This study    |
| <b>Bacteriophages</b>                               |                                                                                                                                                                      |               |
| <i>Staphylococcus</i> phage 81                      |                                                                                                                                                                      | (6)           |
| <b>plasmids</b>                                     |                                                                                                                                                                      |               |
| pMAD                                                | <i>S. aureus</i> shuttle vector, Ery <sup>r</sup>                                                                                                                    | (7)           |
| pET11b                                              | <i>E. coli</i> expression plasmid                                                                                                                                    | Novagen       |
| pRB473                                              | pRB373-derivative, <i>E. coli</i> / <i>S. aureus</i><br>shuttle vector, containing xylose<br>-inducible P <sub>Xyl</sub> promoter Amp <sup>r</sup> , Cm <sup>r</sup> | (8, 9)        |
| pMAD- <i>qsrR</i>                                   | pMAD-derivative, <i>S. aureus</i> shuttle vector, <i>qsrR</i><br>deletion, Ery <sup>r</sup>                                                                          | This study    |
| pMAD- <i>mhqR</i>                                   | pMAD-derivative, <i>S. aureus</i> shuttle vector, <i>mhqR</i><br>deletion, Ery <sup>r</sup>                                                                          | This study    |
| pET11b- <i>mhqR</i>                                 | pET11b-derivative for overexpression<br>of His-tagged MhqR                                                                                                           | This study    |
| pET11b- <i>mhqRC95A</i>                             | pET11b-derivative for overexpression<br>of His-tagged MhqRC95A                                                                                                       | This study    |
| pRB473- <i>mhqR</i>                                 | pRB473-derivative expressing <i>mhqR</i> under P <sub>Xyl</sub>                                                                                                      | This study    |
| pRB473- <i>mhqRC95A</i>                             | pRB473-derivative expressing <i>mhqRC95A</i> under P <sub>Xyl</sub>                                                                                                  | This study    |
| pRB473- <i>brx-roGFP2</i>                           | pRB473-derivative expressing <i>brx-roGFP2</i> under P <sub>Xyl</sub>                                                                                                | (5)           |

R<sup>r</sup>: resistant, Amp: ampicillin, Ery: erythromycin, Cm: chloramphenicol

## Supplementary References

1. Studier FW, Moffatt BA. 1986. Use of bacteriophage T7 RNA polymerase to direct selective high-level expression of cloned genes. *J Mol Biol* 189:113-30.
2. Shafer WM, Iandolo JJ. 1979. Genetics of staphylococcal enterotoxin B in methicillin-resistant isolates of *Staphylococcus aureus*. *Infect Immun* 25:902-11.
3. Gill SR, Fouts DE, Archer GL, Mongodin EF, Deboy RT, Ravel J, Paulsen IT, Kolonay JF, Brinkac L, Beanan M, Dodson RJ, Daugherty SC, Madupu R, Angiuoli SV, Durkin AS, Haft DH, Vamathevan J, Khouri H, Utterback T, Lee C, Dimitrov G, Jiang L, Qin H, Weidman J, Tran K, Kang K, Hance IR, Nelson KE, Fraser CM. 2005. Insights on evolution of virulence and resistance from the complete genome analysis of an early methicillin-resistant *Staphylococcus aureus* strain and a biofilm-producing methicillin-resistant *Staphylococcus epidermidis* strain. *J Bacteriol* 187:2426-38.
4. Kreiswirth BN, Lofdahl S, Betley MJ, O'Reilly M, Schlievert PM, Bergdoll MS, Novick RP. 1983. The toxic shock syndrome exotoxin structural gene is not detectably transmitted by a prophage. *Nature* 305:709-12.
5. Loi VV, Harms M, Müller M, Huyen NTT, Hamilton CJ, Hochgräfe F, Pane-Farre J, Antelmann H. 2017. Real-time imaging of the bacillithiol redox potential in the human pathogen *Staphylococcus aureus* using a genetically encoded bacilliredoxin-fused redox biosensor. *Antioxid Redox Signal* 26:835-848.
6. Rosenblum ED, Tyrone S. 1964. Serology, density, and morphology of staphylococcal phages. *J Bacteriol* 88:1737-42.
7. Arnaud M, Chastanet A, Debarbouille M. 2004. New vector for efficient allelic replacement in naturally nontransformable, low-GC-content, gram-positive bacteria. *Appl Environ Microbiol* 70:6887-91.
8. Brückner R, Wagner E, Götz F. 1993. Characterization of a sucrase gene from *Staphylococcus xylosus*. *J Bacteriol* 175:851-7.
9. Pöther DC, Gierok P, Harms M, Mostertz J, Hochgräfe F, Antelmann H, Hamilton CJ, Borovok I, Lalk M, Aharonowitz Y, Hecker M. 2013. Distribution and infection-related functions of bacillithiol in *Staphylococcus aureus*. *Int J Med Microbiol* 303:114-23.
