# Supplementary material for: The MarR-Type Repressor MhqR Confers Quinone and Antimicrobial Resistance in Staphylococcus aureus
Source: PubMed Central journal article supplement (PMC6798810; doi:10.1089/ars.2019.7750), 2019-10-17
Supplement: Supp_Table4.pdf [file Supp_Table4.pdf]

**Table S4: Oligonucleotide sequences**

| <b>Primer name</b>       | <b>Sequence (5' to 3')</b>                               |
|--------------------------|----------------------------------------------------------|
| SACOL2531-pET- For-NheI  | CTAGCTAGCATGGATCGAACGAAACAATCTC                          |
| SACOL2531-pET-Rev-BamHI  | CGCGGATCCTTAGTGATGGTGATGGTGATGCACTTCTGTAGATT<br>GTGCACTT |
| SACOL2531-pET-C95A-Rev   | ACCTTTTTTCAGTTAACGCAGCCATATATACACG                       |
| SACOL2531-pET-C95A-For   | CGTGTATATATGGCTGCGTAACTGAAAAAGGT                         |
| SACOL2531-pMAD-For-BglII | CGCAGATCTTTTAAGTAGTTTTTTGCCAACAC                         |
| SACOL2531-pMAD-Rev-Sall  | CCAGTCGACTGTTTAACACCAAACATCATCAA                         |
| SACOL2531-pMAD-F1 -Rev   | GTCTCAGCATGCTTAGGGAAACTTTTGTAATTTGCTCTAATGTG             |
| SACOL2531-pMAD-F2-For    | CACATTAGAGCAAATTACAAAAGTTTCCCTAAGCATGCTGAGAC             |
| SACOL2531-pRB-For-BamHI  | TAGGGATCCTAAAATAAAAAAGTTGGTGATCATATGGATCGAAC<br>GAAACAAT |
| SACOL2531-pRB-Rev-KpnI   | CTCGGTACCTTACACTTCTGTAGATTGTGCACTT                       |
| emsa2531-for             | ACATATCAACTCCTATCATGATT                                  |
| emsa2531-rev             | CGTTCGATCCATATGATCACC                                    |
| EMSA_m1_for              | TATCCCTAAATCGAAATA                                       |
| EMSA_m1_rev              | TATTTGATTTAGGGATA                                        |
| EMSA_m2_for              | TATCTCGAAATAGGAATA                                       |
| EMSA_m2_rev              | TATTCCTATTTGAGATA                                        |
| SACOL2529-for            | GCATGGTACAGGTGGTGATG                                     |
| SACOL2529-rev            | CTAATACGACTCACTATAGGGAGATGTGCCCCACGTGTATTTAA             |
| SACOL2115-pMAD-for-BglII | CGCAGATCTTCGCATCAATAATAATGCGCC                           |
| SACOL2115-pMAD-F1-Rev    | CTTCAATTGGATGTAAAGCCTCGGACATACTTCCATCATCTTC              |
| SACOL2115-pMAD-F2-For    | GAAGATGATGGAAGTATGTCCGAGGCTTTACATCCAATTGAAG              |
| SACOL2115-pMAD-rev-Sall  | CCAGTCGACCTTTCACTCCTCAAGAATGATT                          |
| trxA-for                 | GCAACATGGTGTGGTCCAT                                      |
| trxA-rev                 | CTAATACGACTCACTATAGGGAGATGGTTGGAACCAACAACCTT             |
